# Supplementary material
Source: ML conference proceedings conference paper supplement (https://openreview.net/forum?id=3v44ls_4dbg)
Supplement: supplementary_material [file attachment]

---

# Learning Infinite-Horizon Average-Reward Restless Multi-Action Bandits via Index Awareness

---

Guojun Xiong, Shufan Wang, Jian Li  
SUNY-Binghamton University  
{gxiong1,swang214,lij}@binghamton.edu

## Abstract

We consider the online restless bandits with average-reward and multiple actions, where the state of each arm evolves according to a Markov decision process (MDP), and the reward of pulling an arm depends on both the current state of the corresponding MDP and the action taken. Since finding the optimal control is typically intractable for restless bandits, existing learning algorithms are often computationally expensive or with a regret bound that is exponential in the number of arms and states. In this paper, we advocate *index-aware reinforcement learning* (RL) solutions to design RL algorithms operating on a much smaller dimensional subspace by exploiting the inherent structure in restless bandits. Specifically, we first propose novel index policies to address dimensionality concerns, which are provably optimal. We then leverage the indices to develop two low-complexity index-aware RL algorithms, namely, (i) GM-R2MAB, which has access to a generative model; and (ii) UC-R2MAB, which learns the model using an upper confidence style online exploitation method. We prove that both algorithms achieve a sub-linear regret that is only polynomial in the number of arms and states. A key differentiator between our algorithms and existing ones stems from the fact that our RL algorithms contain a novel exploitation that leverages our proposed provably optimal index policies for decision-makings.

## 1 Introduction

Restless multi-armed bandits (RMAB) [64] have been used to model a variety of sequential decision making problems such as congestion control [7, 6], job scheduling [51, 35, 13, 68], wireless communication [57, 21, 9, 20, 71], healthcare [23, 14, 44, 47, 48, 40], queueing systems [28, 32, 5, 16, 42, 41], and cloud computing [17, 52, 67]. In RMAB, there is a collection of  $N$  arms, each of which is endowed with a state that evolves independently according to a two-action Markov Decision Process (MDP) [55]. If the arm is “pulled” or “activated” at any moment in time, it advances stochastically according to one transition kernel, and if not, then it advances according to a different kernel. Rewards are generated with each transition, and the goal is to maximize the expected total reward over an infinite horizon, subject to a constraint on the number of arms activated at any moment in time.

A critical limitation of classical RMAB frameworks is that only two actions, either pulled or not pulled, are allowed for each arm. This is restrictive since the decision maker in many applications often has access to multiple actions for each arm [40, 18]. To this end, we consider an under-examined generalization of RMAB that allows for multiple actions per arm with different degrees of costs, which we call *the restless multi-action multi-armed bandits*, dubbed as R2MAB, in the infinite-horizon average-reward setting. Our objective is to develop simple reinforcement learning (RL) algorithms to solve R2MAB without knowing the underlying MDPs associated with each arm. Although RMAB or R2MAB has found its success in many applications as aforementioned, the fundamental theoretical understanding of how to develop *low computation-complexity* and *order-of-optimal regret* RL algorithms, two of

the most important performance metrics for online restless bandits, remains in its infancy so far. In particular, three important aspects of RL algorithms for RMAB or R2MAB deserve special attentions:

- ▷ First, most upper confidence bound (UCB) based policies [45, 60, 46, 59] for RMAB often leverage *a heuristic policy* in the exploitation phase, e.g., constantly pulling one arm, which does not have any performance guarantee. Hence, these policies *may not perform close to the offline optimum*. This is partially due to the fact that finding an optimal solution for RMAB is PSPACE-hard [54], hence infeasible. The fundamental challenge lies in the explosion of state space and the curse of dimensionality prevents computing optimal policies. Though Whittle index policy [64] is a powerful tool to address the state space explosion, finding the Whittle index is typically intractable [51].
- ▷ Second, existing RL algorithms with a theoretical guarantee of a sub-linear regret upper bound, e.g., colored-UCRL2 [53], suffers from *an exponential computational complexity*, and the regret bound is *exponential in the number of states and arms*. This is due to the fact that it needs to solve Bellman equations with an exponentially large space set. Likewise, the class of Thompson sampling based algorithms [38, 37] provide theoretical guarantees in the Bayesian setting, where the updates can be computationally expensive, especially when the likelihood functions are complex.
- ▷ Third, although the design of low computation-complexity solutions for online RMAB has been gaining attentions, e.g., [25, 8, 15, 39, 62, 65, 56, 66], many challenges remain unsolved. For instance, [25, 8, 15, 39, 56] lacked finite-time performance analysis and these multi-timescale stochastic approximation algorithms often suffer from slow convergence. [65, 66] focused on the finite-horizon setting, which makes their approach not directly applicable to ours since the average reward setting studied in this paper is more challenging to analyze compared to the finite-horizon setting, which necessitates different proof techniques. [62] achieved a low-complexity policy but is constrained to a specific birth-death Markovian model and is not easy to be directly generalized.

The lack of a fundamental understanding on how to design efficient RL algorithms for R2MAB in the infinite-horizon average-reward setting that consider the above three aspects in terms of provably optimal policy, computational complexity, exponential pre-factor in the regret bound, and sub-linear regret performance guarantees, motivates us to fill the gap by advocating **index-aware RL solutions** in this paper. Specifically, our index-aware RL solutions operate on a much smaller dimensional subspace by exploiting the inherent structure encoded in R2MAB problems. This requires us to first design low-complexity provably optimal index policies for R2MAB, and then RL algorithms that leverage the structure of provably optimal index policies in the exploitation phase for decision-makings so as to reduce the high computational complexity and exponential factor in regret analysis. Our main contributions in this paper are summarized as follows:

- To address the dimensionality concerns in R2MAB, we first develop low-complexity index policies for R2MAB when the underlying MDPs are known. In contrast to the celebrated Whittle index policy, which requires the notoriously difficult-to-verify indexability condition, we bypass the task of deriving index policies by taking a more general linear programming (LP) approach, and hence is computationally efficient. We show that our proposed index policy is asymptotically optimal.
- We develop two index-aware RL algorithms for infinite-horizon average-reward R2MAB, namely, (i) GM-R2MAB, a generative model based approach that obtains samples initially then creates the model; and (ii) UC-R2MAB, an online approach wherein the model is updated as samples are obtained. Both algorithms follow a two-stage pattern of model construction and an index policy based solution. The algorithms solve an extended linear programming (ELP) problem from which we construct the provably optimal index policies to be executed during the exploitation phase in both algorithms. The key differentiator between our index-aware RL solutions and aforementioned state of the arts stems from two perspectives: (a) our index-aware RL solutions are computationally appealing since our index based solutions are merely based on solving an ELP, which is exponentially better than state-of-the-art methods such as colored-UCRL2; (b) our index-aware RL solutions contain a novel exploitation phase by leveraging our proposed provably optimal index policy for decision-makings, rather than using a heuristic one or black-box oracle in aforementioned existing algorithms.
- We provide the first-ever regret analysis for infinite-horizon average-reward R2MAB. We show that the above key differentiators in the design of GM-R2MAB and UC-R2MAB, contribute to their  $\tilde{O}(\sqrt{T})$  regret, which is only polynomial in the number of arms and states. It is worth noting that GM-R2MAB and UC-R2MAB achieve low computational complexity and a sub-linear  $\tilde{O}(\sqrt{T})$  regret with a polynomial pre-factor *all at once*, while none of aforementioned state of the arts achieve so.

## 2 Model Description and Problem Formulation

We consider the restless multi-action multi-armed bandits (R2MAB) problem in continuous time. There are a total of  $N$  arms. Each arm  $n \in \mathcal{N}$  is described by a MDP  $(\mathcal{S}, \mathcal{A}, P_n, r_n)$ , where  $\mathcal{S}$  is the state space,  $\mathcal{A}$  is the action space,  $P_n(s'|s, a)$  indicates the probability of reaching state  $s'$  by taking action  $a$  in state  $s$ , and  $r_n(s, a)$  is the reward of each state-action pair  $(s, a)$ . We assume that  $\mathcal{S}$  and  $\mathcal{A}$  are finite sets with cardinalities  $S$  and  $A$ , respectively. Our results and analysis will still apply when each arm has its own sets of states and actions; so, without loss of generality, we will simply assume that all arms share the same state and action sets. We consider the unichain MDPs in this paper, which in fact is known to be necessary to guarantee the existence of stationary policies for the infinite-horizon average-reward R2MAB (and MDPs) regardless of initial states [55, 3]. We refer to action  $a = 0$  as *passive action* and any action  $a > 0$  as an *active action*. Moreover, using the standard terminology from the restless bandits literature [64], we call an arm *active* when an active action is applied to it and *passive* otherwise. A cost is incurred when action  $a$  is applied to arm  $n$  in state  $s$ . For abuse of notation, we denote the cost as  $a$  itself. We assume that the maximum cost to activating arms at any moment in time is  $B$ , which we call the *activation budget*.

The decision-making scenario is as follows. At any moment in time  $t$ , each arm can be either active or passive. When action  $a_n(t) = a$  is applied to arm  $n$  in state  $s_n(t) = s$ , it takes an exponentially distributed amount of time to transition to state  $s'$  with rate  $P_n(s, a, s')$ ,  $\forall s, s' \in \mathcal{S}, a \in \mathcal{A}$ . Decision epochs/time are defined as the moments when the state of an arm changes. A *policy* determines what actions to be applied to each arm at each decision epoch, with the restriction that at most  $B$  activation budgets can be used for activating arms. After receiving an action, each arm incurs an immediate reward  $r_n(t) = r_n(s, a)$ , which is a random variable with support  $[0, 1]$  and mean  $\bar{r}_n(s, a)$ . Without loss of generality, we further assume that only active arms yield rewards, i.e.,  $r_n(s, 0) = 0, \forall s \in \mathcal{S}$ .

**Remark 1.** *In general, there are two reward models considered in RMAB literature: (1) Model 1: All arms yield rewards no matter activated or not; and (2) Model 2: Only activated arms yield rewards. Both models have been widely used and risen in different applications. For example, Model 1 is widely adopted for queueing problems [16, 17, 28, 32], where all queues incur hold costs, along with others [5, 15, 25, 39]. Model 2 is widely adopted for cognitive radios [9, 20, 21, 45], where rewards are generated only on the state of selected channels, along with many other learning augmented RMAB settings [2, 59, 60, 62, 65]. These two models are similar without fundamental differences as discussed in [2], and they are exactly the same under the assumption that  $r_n(s, 0) = 0, \forall s \in \mathcal{S}$ . Our proposed solutions in this paper hold for both models.*

Let  $\Pi$  be the set of all possible policies for the considered R2MAB problem and  $\pi$  is a feasible policy in  $\Pi$ , satisfying  $\pi \in \Pi : \mathcal{F}_t \mapsto \mathcal{A}^N$ , where  $\mathcal{F}_t$  is the sigma-algebra [58] generated by random variables  $\{s_n(h), a_n(h) : \forall n \in \mathcal{N}, h \leq t\}$ . The objective of the decision maker is to maximize the expected long-term average reward of activating arms subject to the activation budget constraint, i.e.,

$$\text{R2MAB: } \max_{\pi \in \Pi} \liminf_{T \rightarrow \infty} \frac{1}{T} \mathbb{E}_\pi \left( \int_{t=0}^T \sum_{n=1}^N r_n(t) dt \right), \quad \text{subject to } \sum_{n=1}^N a_n(t) \leq B, \quad \forall t. \quad (1)$$

When the underlying MDP (i.e., transition kernel and reward function) of each arm is known, the R2MAB problem (1) in theory can be solved using relative value iteration [55, 12]. Unfortunately, this approach suffers from the curse of dimensionality [10, 12], and lacks of insights for the solution structure. When the underlying MDPs are not known, off-the-shelf RL algorithms are either computationally expensive or without an  $\tilde{O}(\sqrt{T})$  regret guarantee. In the remainder of the paper, we first build a low-complexity index based policy for (1) with optimality guarantee when the MDPs are known in Section 3, and then design index-aware RL algorithms for (1) that not only are computationally efficient but also achieve an  $\tilde{O}(\sqrt{T})$  regret when the MDPs are unknown in Section 4.

## 3 An Index-based Policy and Asymptotic Optimality

Rather than solving (1) exactly, we instead construct an index based policy for the original R2MAB (1) that we prove to be asymptotically optimal. To describe our index policy design in Section 3.1, we first need to introduce the following linear programming (LP), in which the decision variables are the

occupancy measures [3] of the controlled MDP processes:

$$\text{LP}(P_n, r_n, \forall n) : \max_{\Omega_\pi} \sum_{n=1}^N \sum_{(s,a) \in \mathcal{S} \times \mathcal{A}} \omega_n(s, a) \bar{r}_n(s, a) \quad (2)$$

$$\text{subject to } \sum_{n=1}^N \sum_{(s,a) \in \mathcal{S} \times \mathcal{A}} a \omega_n(s, a) \leq B, \quad (3)$$

$$\sum_a \omega_n(s, a) = \sum_{s'} \sum_{a'} \omega_n(s', a') P_n(s', a', s), \quad \forall n \in \mathcal{N}, \quad (4)$$

$$\sum_{(s,a) \in \mathcal{S} \times \mathcal{A}} \omega_n(s, a) = 1, \quad \omega_n(s, a) \geq 0, \quad \forall n \in \mathcal{N}, s \in \mathcal{S}, a \in \mathcal{A}. \quad (5)$$

One can arrive at the LP (2)-(5) by replacing all random variables in the relaxed version of (1) in which the activation cost at time  $t$  is limited by  $B$  on average, with their *expected values* via introducing a new set of variables  $\omega_n(s, a)$ , which are called *occupancy measures* [3] of the controlled MDP corresponding to arm  $n$ . Specifically, the occupancy measure  $\Omega_\pi$  of a stationary policy  $\pi$  for the  $N$  controlled infinite-horizon MDPs is defined as the expected average number of visits to a state-action pair  $(s, a)$ , i.e.,

$$\Omega_\pi = \left\{ \omega_n(s, a) \triangleq \lim_{T \rightarrow \infty} \frac{1}{T} \mathbb{E}_\pi \left( \int_{t=1}^T \mathbb{1}(s_n(t) = s, a_n(t) = a) dt \right) : n \in \mathcal{N}, s \in \mathcal{S}, a \in \mathcal{A} \right\}.$$

It can be easily checked that the occupancy measure satisfies  $\sum_{(s,a)} \omega_n(s, a) = 1$ , and hence  $\omega_n, \forall n \in \mathcal{N}$  is a probability measure. To this end, (4) represents the fluid transition of the occupancy measure, which holds due to the ergodic theorem [19] for finite MDPs [61]; and (5) follows the fact that the occupancy measure is a probability measure. Thus the feasible set of LP (2)-(5) is non-empty. We denote the optimal solution to the LP (2)-(5) as  $\Omega_{\pi^*} = \{\omega_n^*(s, a) : n \in \mathcal{N}, s \in \mathcal{S}, a \in \mathcal{A}\}$ , and the corresponding optimal value as  $V^* := \sum_{n=1}^N \sum_{(s,a)} \omega_n^*(s, a) r_n(s, a)$ , which serves as an upper bound on the reward of the original R2MAB (1).

**Lemma 1.** *The optimal value achieved by the LP (2)-(5) is an upper bound of that of the R2MAB (1).*

### 3.1 An Index Based Policy

Unfortunately, the solution to the LP (2)-(5) does not always provide a feasible decision to the original R2MAB (1). This is because the activation budget constraint in (1) must be met at all time, instead of just in the average sense as in (3). Exacerbating this problem is the fact that the average constraint may be violated severely during the decision epochs, resulting in poor policy performance. We overcome these challenges by introducing a computationally appealing index policy that we prove to be asymptotically optimal. Specifically, our index policy is derived from the optimal solutions  $\Omega_{\pi^*} = \{\omega_n^*(s, a)\}$  and the index assigned to arm  $n$  in state  $s_n(t) = s$  at time  $t$  is defined as

$$\mathcal{I}_n(s) := \sum_{a \in \mathcal{A}} \frac{\omega_n^*(s, a) \bar{r}_n(s, a)}{\sum_{a' \in \mathcal{A}} \omega_n^*(s, a')}, \quad (6)$$

where  $\xi_n(s, a) \triangleq \frac{\omega_n^*(s, a)}{\sum_{a' \in \mathcal{A}} \omega_n^*(s, a')}$  represents the probability of applying action  $a_n(t) = a$  to arm  $n$  in state  $s_n(t) = s$  at time  $t$  [3] when  $\sum_{a' \in \mathcal{A}} \omega_n^*(s, a') > 0$ , and otherwise arm  $n$  can be simply made passive. Hence, the index of arm  $n$  in (6) represents the expected obtained reward of activating arm  $n$  in state  $s$ . To this end, we rank all arms based on their indices (6) in a non-increasing order, and activate the set of highest indexed arms, denoted as  $\mathcal{N}(t) \subset \mathcal{N}$ , such that the corresponding activation cost of arms in  $\mathcal{N}(t)$  is within the activation budget  $B$ , i.e.,  $\sum_{n \in \mathcal{N}(t)} a_n^*(s_n(t)) \leq B$ . Here  $a_n^*(s_n(t))$  is the action for arm  $n$ , which is determined according to the probability  $\xi_n(s, a)$  based on its current state  $s_n(t) = s$  at time  $t$ . When multiple arms share the same indices, we randomly activate one arm and allocate the remaining activation costs across all possible actions according to the probability  $\xi_n(s, a)$ . All remaining arms are kept passive in case they have zero indices. We call our index based policy, ERC, since it *rankes arms by Expected Reward and pull arms constrained by activation Cost*. We denote the resultant index based policy as  $\pi^* = \{\pi_n^*, n \in \mathcal{N}\}$ .

**Remark 2.** Unlike Whittle-based index policies [64, 31, 28, 72, 39, 67], our ERC does not require the indexability condition, which is often hard to establish especially when the transition kernel of the underlying MDP is convoluted [51]. Like Whittle policies, our ERC is computationally efficient since it is merely based on solving a LP. We remark that [61] also considered average-reward R2MAB, however, only one action can be chosen deterministically for each state with no difference in activation cost. Hence it cannot be generalized to ours since we consider a randomized policy for each state with heterogeneous activation costs across different actions. Finally, another line of works [34, 65, 66, 69, 70] designed index policies without indexability requirement for finite-horizon restless bandits, and hence cannot be directly applied to our infinite-horizon average-reward R2MAB.

### 3.2 Asymptotic Optimality

We now show that ERC is asymptotically optimal in the same asymptotic regime as that in Whittle [64] and many others [63, 61, 72], where all  $N$  arms are generalized to  $N$  classes, and both the number of class- $n$  arms and the activation budget  $B$  are scaled by  $\rho$ , with their ratio holding constant. Denote  $X_n^\rho(\pi^*, s, a; t)$  as the number of class- $n$  arms at state  $s$  taking action  $a$  at time  $t$  under ERC  $\pi^*$ . We will be interested in this fluid-scaling process with parameter  $\rho$ , and define the expected long-term average reward as  $V_{\pi^*}^\rho := \liminf_{T \rightarrow \infty} \frac{1}{T} \mathbb{E}_{\pi^*} \left( \int_{t=1}^T \sum_{n=1}^N \sum_{(s,a)} r_n(s, a) \frac{X_n^\rho(\pi^*, s, a; t)}{\rho} dt \right)$ . Our ERC  $\pi^*$  is asymptotically optimal only when  $V_{\pi^*}^\rho \geq V_\pi^\rho, \forall \pi \in \Pi$ . Before presenting our main result in this section, we first state the following technical condition called “global attractor” [63].

**Definition 1.** An equilibrium point  $X^{\rho, \star}/\rho$  under ERC  $\pi^*$  is a global attractor for the process  $X^\rho(\pi^*; t)/\rho$ , if, for any initial point  $X^\rho(\pi^*; 0)/\rho$ , the process  $X^\rho(\pi^*; t)/\rho$  converges to  $X^{\rho, \star}/\rho$ .

**Remark 3.** The global attractor indicates that all trajectories converge to  $X^{\rho, \star}$ . Though it may be difficult to establish analytically that a fixed point is a global attractor for the process [61], such assumption has been made in [63, 31, 61, 72, 24] and is only verified numerically. Our experimental results in Appendix E show that such convergence indeed occurs for our ERC  $\pi^*$ .

**Theorem 1.** Our ERC  $\pi^*$  is asymptotically optimal under Definition 1, i.e.,  $\lim_{\rho \rightarrow \infty} V_{\pi^*}^\rho - V_{\pi^{\text{opt}}}^\rho = 0$ , where  $\pi^{\text{opt}}$  represents the optimal policy for the original R2MAB (1).

## 4 Index-aware Reinforcement Learning Solutions

We now consider to learn the R2MAB (1) when the transition kernel  $P_n$  and reward function  $r_n$ ,  $\forall n \in \mathcal{N}$  are unknown. Our goal is to provide low-complexity index-aware RL algorithms and determine their finite-time performance measured by the regret [43], which is defined as follows:

**Definition 2.** The regret of policy  $\pi$  is defined as the expected gap between the offline optimum, i.e., the best policy under which both the transition kernels and reward functions are known, and the cumulative reward of the arm selecting algorithm, i.e.,  $\text{Reg}(\pi, T) := T\mu^{\text{opt}} - \mathbb{E}_\pi[R(\pi, T)]$ , where  $\mu(\pi) := \lim_{T \rightarrow \infty} \frac{1}{T} \mathbb{E}[R(\pi, T)] = \lim_{T \rightarrow \infty} \frac{1}{T} \mathbb{E}[\sum_{t=1}^T \sum_{n=1}^N r_n(t)]$  is the expected average reward under policy  $\pi$ , and  $\mu^{\text{opt}} := \sup_\pi \mu(\pi)$  is the optimal average reward, which is independent of the initial state for MDPs with finite diameter [55].

**Remark 4.** Since finding the offline optimum for R2MAB is intractable, we characterize the regret with respect to the ERC index policy. This is due to the fact that our ERC index policy is asymptotically optimal. Similar definition appears in [2, 65] when learning Whittle index policy for RMAB.

### 4.1 GM-R2MAB: Generative Model Based Index-Aware Reinforcement Learning

We first introduce a generative model based R2MAB learning algorithm called GM-R2MAB, which contains two phases: (i) the exploration phase (lines 1-3 in Algorithm 1) and the exploitation phase (lines 4-6 in Algorithm 1). During the exploration phase, GM-R2MAB samples each state-action pair  $(s, a)$  for  $J(T)$  times ( $J(T)$  to be specified later) for each arm  $n$ , counts the number of times  $T_n(s, a, s')$  for each transition to the next state  $s'$ , and constructs an empirical model of transition kernel and reward function, denoted by  $\hat{P}_n(s'|s, a) = \frac{T_n(s, a, s')}{J(T)}$  and  $\hat{r}_n(s, a) = \frac{1}{J(T)} \sum_{h=1}^{J(T)} r_n(s, a; h) \mathbb{1}(s_n(h) = s, a_n(h) = a)$ ,  $\forall (s, a, s'), n \in \mathcal{N}$ , respectively. Using these empirical estimates, GM-R2MAB creates a set of plausible MDPs such that the transition

kernels and reward functions are close to the true ones, which are defined as

$$\mathcal{M} = \{M_n = (\mathcal{S}, \mathcal{A}, \tilde{P}_n, \tilde{r}_n) : |\tilde{P}_n(s'|s, a) - \hat{P}_n(s'|s, a)| \leq \delta, \tilde{r}_n(s, a) = \hat{r}_n(s, a) + \delta, \forall n, s, a\}, \quad (7)$$

where  $\delta = \sqrt{\frac{1}{2J(T)} \log \frac{2SANT(T)}{\eta}}$  for  $\eta \in (0, 1)$  is built using the Hoeffding inequality [49].

---

**Algorithm 1** GM-R2MAB

---

**Require:** Time horizon  $T$ , learning function  $J(T) < T$ .

- 1: **for**  $n = 1, 2, \dots, N$  **do**
  - 2:   Observe arm  $n$  until there are  $J(T)$  visits of pairs  $(s_n(t) = s, a_n(t) = a), \forall s \in \mathcal{S}, a \in \mathcal{A}$ .
  - 3: **end for**
  - 4: Construct the set of plausible MDPs  $\mathcal{M}$  as in (7);
  - 5: Compute the corresponding ERC index policy  $\pi^*$  by solving **ELP**( $\mathcal{M}$ );
  - 6: Execute  $\pi^*$  to the end.
- 

In the exploitation phase, GM-R2MAB computes the ERC index policy  $\pi^*$  by performing optimistic planning. In other words, GM-R2MAB selects an optimistic transition kernel, an optimistic reward function, and an optimistic policy to maximize the objective function while satisfying the constraints. More specifically, it can be expressed as the following optimization problem,

$$(\tilde{P} = \{\tilde{P}_n, \forall n\}, \pi^*) = \arg \max_{M_n \in \mathcal{M}} \text{LP}(\tilde{P}_n, \tilde{r}_n, \forall n). \quad (8)$$

To solve (8), GM-R2MAB uses **Extended LP (ELP)** by leveraging the state-action-state occupancy measure  $z_n(s, a, s')$  defined as  $z_n(s, a, s') = P_n(s'|s, a)\omega_n(s, a)$  to express the confidence intervals of transition probabilities. The description of **ELP** is provided in Appendix A. Once we compute  $\{z_n^*, \forall n\}$ , the probabilities  $\xi_n(s, a)$  and hence the indices  $\mathcal{I}_n(s)$  in (6) are recovered from the computed occupancy measures as  $\mathcal{I}_n(s) := \frac{\sum_{s' \in \mathcal{S}} z_n^*(s, a, s') \tilde{r}_n(s, a)}{\sum_{b \in \mathcal{A}, s' \in \mathcal{S}} z_n^*(s, b, s')}$ , from which we can construct our ERC index policy  $\pi^*$ , and execute  $\pi^*$  to the end.

#### 4.1.1 Regret Analysis of GM-R2MAB

To characterize the regret, we first introduce the definition of ergodicity coefficient [4, 2]. For ease of readability, we denote the state for all arms as a stacked vector  $\mathbf{s} \in \mathcal{S}^N := [s_1, s_2, \dots, s_N]$ , the corresponding actions under policy  $\pi^*$  as  $\pi^*(\mathbf{s})$ , and the unknown MDPs as  $\Theta := [\theta_1, \theta_2, \dots, \theta_N]$  with  $\theta_n := (P_n, r_n)$ . The transition kernel of the stacked system is then  $P_\Theta(\cdot|\mathbf{s}, \pi^*(\mathbf{s})), \forall \mathbf{s} \in \mathcal{S}^N$ .

**Definition 3.**  $D_{P_\Theta} := 1 - \min_{\mathbf{s}, \mathbf{s}'} \sum_{\mathbf{z} \in \mathcal{S}^N} \min\{P_\Theta(\mathbf{z}|\mathbf{s}, \pi^*(\mathbf{s})), P_\Theta(\mathbf{z}|\mathbf{s}', \pi^*(\mathbf{s}'))\}$  is defined as the ergodicity coefficient of  $P_\Theta$ , and  $D := \sup_{\Theta} D_{P_\Theta}$  as the maximum value.

**Theorem 2.** The regret of GM-R2MAB with  $J(T) = \mathcal{O}(T^{1/2})$  satisfies:

$$\text{Reg}(\pi^*, T) = \mathcal{O} \left( \sqrt{T} \left( SAB + \frac{BN}{1-D} \sqrt{\log \frac{4SANT}{\eta}} \right) \right). \quad (9)$$

The regret comes from the exploration and exploitation phases in GM-R2MAB, respectively. Specifically, the first term  $\mathcal{O}(SAB\sqrt{T})$  in (9) is the worst regret from explorations of each state-action pair under the generative model with  $J(T)$  time steps for sampling, and the second term comes from the policy execution phase of GM-R2MAB due to MDP model mismatch. The proof of Theorem 2 differs from the traditional analysis framework of generative based RL for restless bandits [62, 65], particularly in the way to track regrets due to model mismatch. We leverage the form of Bellman equations of long-term average MDPs and transfer the regret to the difference of relative value functions. This enables us to track the regret relying only on the first moment behavior of transition kernels. However, [62] depended on higher order moment behavior of transition kernels to track regrets. The higher moment behavior is typically hard to analyze for a general MDP other than the birth-and-death process considered in [62]. [65] tracked regrets by leveraging the optimistic properties of a linear system, which is only applicable to the finite-horizon setting considered in [65].

**Remark 5.** We emphasize that although GM-R2MAB has a similar form as the “explore-then-commit” policy [26], a key differentiator between our GM-R2MAB and state-of-the-art methods stems from two perspectives. First, GM-R2MAB has access to a generative model and samples are taken initially to

---

**Algorithm 2** UC-R2MAB

---

**Require:** Initialize  $C_n^0(s, a) = 0$ , and  $\hat{P}_n^0(s'|s, a) = 1/S, \forall n \in \mathcal{N}, s, s' \in \mathcal{S}, a \in \mathcal{A}$ .

- 1: **for**  $k = 1, 2, \dots, K$  **do**
  - 2:   Construct the set of plausible MDPs  $\mathcal{M}^k$  as in (10);
  - 3:   Compute the corresponding ERC index policy  $\pi^{*,k}$  by solving  $\text{ELP}(\mathcal{M}^k)$ ;
  - 4:   Execute  $\pi^{*,k}$  in the current episode.
  - 5: **end for**
- 

estimate a model. As a result, GM-R2MAB only needs to solve an ELP once to construct a policy, which is computationally efficient. This is in contrast to the state-of-the-art colored-UCRL2 [53], which needs to solve a recursive Bellman equation to derive the policy. One contribution here is to determine the right choice of  $J(T)$ , which plays a key role in balancing the tradeoff between model accuracy and complexity. Second, GM-R2MAB executes our proposed provably optimal ERC index policy in the exploitation phase rather than using a heuristic one as in state of the arts [45, 60, 46, 59]. This contributes to the polynomial prefactor in the regret, compared to an exponential one in colored-UCRL2. Finally, we note that such a generative model based approach has also been used in the context of CMDPs [29, 30] and restless bandits [62, 65]. However, they considered either a finite-time [29, 65] or a discounted setting [30], and hence cannot be directly applied to the infinite-horizon average-reward setting studied in this paper. Furthermore, [29, 30] focused on the sample complexity analysis, which is not directly translatable to the regret [22]. Though Restless-UCB [62] operated in a similar manner as our GM-R2MAB, it depends on the performance of an offline “black-boxed” oracle approximator in the exploitation phase, while our GM-R2MAB leverages an explicit and provably optimal ERC index policy.

## 4.2 UC-R2MAB: Online Index-Aware Reinforcement Learning

The GM-R2MAB approach operates in an “offline” manner in the sense that it first estimates a model by sampling every state-action pair in the system for a certain number of times, and then computes a policy to be executed throughout the exploitation phase. Unfortunately, such an “offline” approach may not be feasible in many real-world applications since some states may not be reachable without executing the policy. To this end, we further develop an “online” approach, dubbed as UC-R2MAB, via interleaving the process of collecting samples from the environments and model updates, which is summarized in Algorithm 2. Specifically, UC-R2MAB operates in an episodic manner where each episode consists of  $H$  consecutive frames. Let  $K$  be the total number of episodes until time  $T$ , hence we have  $T = KH$ . Denote the  $k$ -th episode as  $\mathcal{H}_k$  and let  $\tau_k$  be the time when it starts.

At the beginning of each episode, i.e.,  $\tau_k, \forall k$ , UC-R2MAB estimates the true transition kernel and the true reward by the corresponding empirical averages as  $\hat{P}_n^k(s'|s, a) = \frac{C_n^{k-1}(s, a, s')}{\max\{C_n^{k-1}(s, a), 1\}}, \hat{r}_n^k(s, a) =$

$\frac{1}{\max\{C_n^{k-1}(s, a), 1\}} \sum_{\tau=1}^{k-1} \sum_{h=1}^H r_n(s, a) \mathbb{1}(s_n^\tau(h) = s, a_n^\tau(h) = a)$ , where  $C_n^{k-1}(s, a)$  is the number of visits to state-action pairs  $(s, a)$  until  $\tau_k$ , and  $C_n^{k-1}(s, a, s')$  is the number of transitions from  $s$  to  $s'$  under action  $a$ , satisfying  $C_n^k(s, a) = C_n^{k-1}(s, a) + \sum_{h=1}^H \mathbb{1}(s_n^k(h) = s, a_n^k(h) = a)$ , and  $C_n^k(s, a, s') = C_n^{k-1}(s, a, s') + \sum_{h=1}^H \mathbb{1}(s_n^k(h+1) = s' | s_n^k(h) = s, a_n^k(h) = a)$ ,  $\forall (s, a) \in \mathcal{S} \times \mathcal{A}$  and  $\forall (s, a, s') \in \mathcal{S} \times \mathcal{A} \times \mathcal{S}, \forall n$ , where  $s_n^k(h)$  is the state of arm  $n$  at the  $h$ -th time frame in episode  $k$ .

Similar to GM-R2MAB, UC-R2MAB creates a set of plausible MDPs using these empirical estimates for each episode as in (7) by replacing  $J(T)$  with  $C_n^{k-1}(s, a)$  for each arm  $n$ . Thus for  $\eta \in (0, 1)$ , the set of plausible MDPs in the  $k$ -th episode is defined as

$$\mathcal{M}^k = \{M_n^k = (\mathcal{S}, \mathcal{A}, \tilde{P}_n^k, \tilde{r}_n^k) : |\tilde{P}_n^k(s'|s, a) - \hat{P}_n^k(s'|s, a)| \leq \delta_n^k(s, a), \tilde{r}_n^k(s, a) = \hat{r}_n^k(s, a) + \delta_n^k(s, a)\}. \quad (10)$$

where  $\delta_n^k(s, a) = \sqrt{\frac{1}{2C_n^{k-1}(s, a)} \log \frac{4SAN(k-1)H}{\eta}}$  is built using the Hoeffding inequality [49].

Once constructing the model, UC-R2MAB computes the ERC index policy  $\pi^{*,k}$  in episode  $k$  by solving an ELP, which is described in Appendix A. Specifically, it solves the following optimization problem,

$$(\tilde{P}^k = \{\tilde{P}_n^k, \forall n\}, \pi^{*,k}) = \arg \max_{M_n^k \in \mathcal{M}^k} \text{LP}(\tilde{P}_n^k, \tilde{r}_n^k, \forall n), \quad (11)$$

from which it recovers the indices  $\mathcal{I}_n^k(s)$  to construct ERC and then execute the index policy to the end of this episode. This is the same problem as in (8) except for substituting  $\mathcal{M}$  with  $\mathcal{M}^k$ .

This algorithm draws inspiration from the infinite-horizon algorithm UCRL [36], which uses the sampled trajectory of each episode to update the plausible MDPs of next episode. The major difference that distinguishes our UC-R2MAB is that UC-R2MAB deploys the proposed ERC at each episode, and thus results in solving a low-complexity ELP, which is exponentially better than that of UCRL-based algorithm [36] that needs to solve extended value iterations.

#### 4.2.1 Regret Analysis of UC-R2MAB

**Theorem 3.** *The regret of UC-R2MAB satisfies:*

$$\text{Reg}(\{\pi^{*,k}, \forall k\}, T) = \mathcal{O} \left( \sqrt{T} \left( \frac{1}{2} + \frac{2\sqrt{2}B\sqrt{N}}{1-D} \sqrt{\log \frac{4SANT}{\eta}} \right) \right). \quad (12)$$

Though the design of UC-R2MAB is inspired by UCRL type algorithms, the regret analysis of UC-R2MAB differs from colored-UCRL2 [53], a state-of-the-art method for online restless bandits. The major difference comes from the fact that UC-R2MAB leverages the relative value function of Bellman equation for long-term average MDPs to track regrets caused by model mismatch as GM-R2MAB. There are also recent Thompson sampling based results [2] on characterizing Bayesian regret for RMAB while using techniques reminiscent of UC-R2MAB. The sub-linear regret in [2] was achieved by upper bounding the number of episodes to be  $\sqrt{T}$  under a specific requirement for the length of each episode. In contrast, UC-R2MAB directly bounds the sum of regret from each episode without such a episode length constraint.

**Remark 6.** Similar to the state-of-the-art colored-UCRL2 [53] and Thompson sampling based algorithms [37, 38, 2], our UC-R2MAB also operates in an episodic manner and achieves an  $\tilde{\mathcal{O}}(\sqrt{T})$  regret. However, the colored-UCRL2 is known to be computationally expensive and the regret is exponential in the number of arms and states. Likewise, Thompson sampling based methods provide theoretical guarantees in the Bayesian settings and need to implement a computationally expensive method to update the posterior beliefs due to the complex likelihood functions. In contrast, our UC-R2MAB is computationally appealing since it only needs to solve an ELP in each episode, from which UC-R2MAB constructs and implements our proposed ERC index policy. The regret of UC-R2MAB is polynomial in the number of arms and states, which is exponentially better than that of colored-UCRL2. Finally, we remark that the multiplicative “pre-factor” that goes with the time dependent function in the regret of UC-R2MAB is smaller than that of GM-R2MAB. This is due to the fact that UC-R2MAB operates in an episodic manner while GM-R2MAB only samples once initially. This leads to a higher computation complexity of UC-R2MAB, which is  $\mathcal{O}(NSAK)$  compared to that of GM-R2MAB, which is  $\mathcal{O}(NSA)$ .

## 5 Experiments

In this section, we present some of our experimental results. We also demonstrate the utility of our GM-R2MAB and UC-R2MAB by evaluating them under two real-world applications of restless bandits.

### 5.1 Experiments on Constructed Instance

**Instance construction.** We consider a setup with 10 classes of arms. The state space is  $\mathcal{S} \in \{0, 1, 2, 3, 4, 5, 6, 7, 8, 9, 10\}$ . Class- $n$  arm arrives with rate  $3n$  for  $n = 1, \dots, 10$ , and departs with a fixed rate of  $\mu = 20$ . Since Whittle index policy is only designed for RMAB with two actions, we evaluate our algorithms under two settings: (1) two-action setting; and (2) multi-action setting. For two-action setting, we consider a controlled Markov process in which states evolve as a specific birth-death process, i.e., state  $s$  only transit to  $s+1$  or  $s-1$  with probability  $P(s, s+1) = \lambda/(\lambda + \mu)$  and  $P(s, s-1) = \mu/(\lambda + \mu)$ . For active action, class- $n$  arm generates a random reward  $r_n(s) \sim \text{Ber}(sp_n)$ , with  $p_n$  uniformly sampled from  $[0.01, 0.1]$ . The activation budget is set to  $0.3N$ , where we vary the number of arms  $N$  from 50 to 350. For the multi-action setting, we consider a total of 3, 5, 10 actions, and the state of arm  $n$  transition to any state in  $\mathcal{S}$  with a randomized non-zero transition probability. We only present results with 10 actions and provide other results in Appendix E.

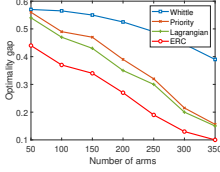

Figure 1: Optimality gap for two actions.

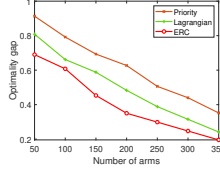

Figure 2: Optimality gap for 10 actions.

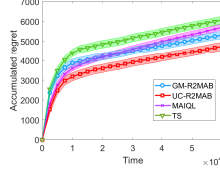

Figure 3: Regret for two actions.

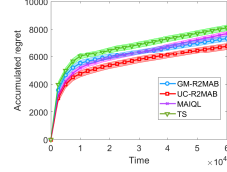

Figure 4: Regret for 10 actions.

**Baselines.** We compare our ERC index policy with Whittle index policy (Whittle) [64], a priority policy (Priority) [61] and a lagrangian based policy (Lagrangian) [40]. We compare our RL solutions GM-R2MAB and UC-R2MAB with a Q-learning based policy (MAIQL) [39], a Thompson sampling policy (TS) [38], Restless-UCB [62], and a set of learning Whittle index based policy including Fu [25], AB [8] and NeurWin [50]. Note that we do not include results of colored-UCRL2 in our comparisons since it is known to suffer from a high computational complexity and is outperformed by existing policies, e.g., Restless-UCB [62]. For ease of readability, we only present results of two “online” baselines for comparisons. More experimental results and the parameter settings for baselines are provided in Appendix E.

**Asymptotic optimality.** We compare the rewards obtained by an index policy with that from the theoretical upper bound obtained by solving the LP (2)-(5). We call the ratio between this award difference and the number of arms as the *optimality gap*. From Figures 1 and 2, we observe that all policies are asymptotically optimal, which is consistent with their theoretical performance guarantees. Our ERC slightly outperforms these baselines in terms of the vanishing speed of optimality gap.

**Regret and running time.** The accumulated regrets are presented in Figures 3 and 4, where we use the Monte Carlo simulation with 1,000 independent trials of a single-threaded program on AMD Ryzen 5800x desktop with 64GB RAM. For simplicity, we choose 200 arms and a time horizon of  $T = 60,000$  slots. Each episode consists of 2,500 slots. We observe that UC-R2MAB achieves the lowest cumulative regret and is better than our “offline” method GM-R2MAB. This is consistent with our theoretical analysis (see Remark 6). A key observation is that for a large horizon  $T$ , our “offline” GM-R2MAB even outperforms the “online” MAIQL. This is because GM-R2MAB leverages our proposed provably optimal ERC index policy in the exploitation phase. We also compare the average running time of these algorithms. For two-action (10-action) setting, the average running time of GM-R2MAB, UC-R2MAB, MAIQL and TS is 86s (144s), 308s (607s), 348s (702s) and 359s (681s), respectively. It is clear that our GM-R2MAB and UC-R2MAB are more efficient in running time. These improvements come from the intrinsic design of our algorithms that merely need to solve an ELP, while TS needs to solve Bellman equations.

## 5.2 Experiments on Real-World Datasets

We demonstrate the utility of GM-R2MAB and UC-R2MAB by evaluating them under two recently studied applications of restless bandits: wireless scheduling with two actions, and tuberculosis care with multiple actions. Due to space constraints, we relegate the detailed descriptions of these two problems to Appendix E.

**Wireless scheduling over fading channels** [1]. A wireless client is modeled as an arm, which has some data to transmit. Each arm suffers from 1 unit holding cost in each time slot until the data is transmitted. The quality of wireless channel, either good or bad, via which data is transmitted determines the amount of transmitted data and varies over time. The goal is to maximize the negative of total holding cost. We adopt the settings in [1], where 1 out of 10 arms is activated at any moment in time. The regret is shown in Figure 5. It is observed that UC-R2MAB outperforms all baselines. Importantly, UC-R2MAB has a sub-linear regret guarantee while the best-performing baseline MAIQL lacks of finite-time analysis. Since the environment is dynamically changing over time, it may be hard to build a perfect simulator and hence UC-R2MAB is preferable than the offline GM-R2MAB.

**Tuberculosis care in India** [40]. A health worker takes three actions on 200 patients to improve their adherence over a course of 6 months. Each action has varying cost and effectiveness: cheap (call patients), semi-expensive (visit patients) and very expensive (escalate patients). The goal is to maximize patients’ adherence subject to a daily time budget due to the limited worker time

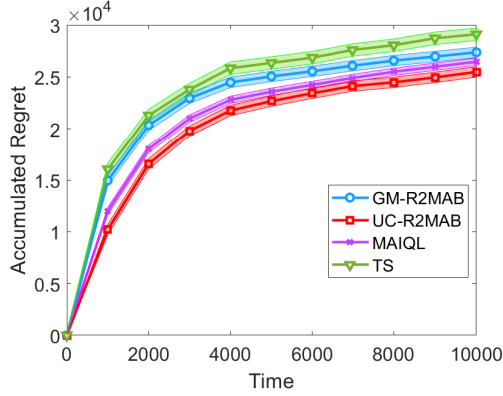

Figure 5: Wireless scheduling.

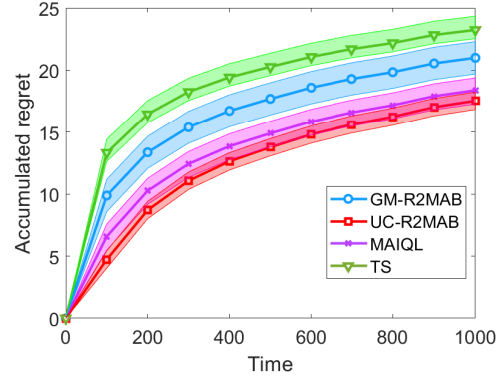

Figure 6: Tuberculosis care in India.

and resources. We adopt the settings in [40] with the budget being 20 and the reward defined as adherence level/3. From Figure 6, we again observe that UC-R2MAB achieves a sub-linear regret and outperforms all baselines.

## 6 Conclusion

In this paper, we developed two low-complexity index-aware RL algorithms, GM-R2MAB and UC-R2MAB for online infinite-horizon average-reward restless multi-action bandits. We proved that both algorithms achieved a sub-linear regret that is only polynomial in the number of arms and states. Our key design to reduce both the computational complexity and exponential factor in regret analysis is via exploiting the inherent structure encoded in restless bandits and leveraging our proposed provably optimal index policies for decision-makings.

## Acknowledgements

This work was supported in part by the National Science Foundation (NSF) grants CRII-CNS-NeTS-2104880 and RINGS-2148309, and was supported in part by funds from OUSD R&E, NIST, and industry partners as specified in the Resilient & Intelligent NextG Systems (RINGS) program, as well as the U.S. Department of Energy (DOE) grant DE-EE0009341. Any opinions, findings, and conclusions or recommendations expressed in this material are those of the authors and do not necessarily reflect the views of the funding agencies.

## References

- [1] Samuli Aalto, Pasi Lassila, and Prajwal Osti. Whittle index approach to size-aware scheduling with time-varying channels. In *Proceedings of the 2015 ACM SIGMETRICS International Conference on Measurement and Modeling of Computer Systems*, pages 57–69, 2015.
- [2] Nima Akbarzadeh and Aditya Mahajan. On learning whittle index policy for restless bandits with scalable regret. *arXiv preprint arXiv:2202.03463*, 2022.
- [3] Eitan Altman. *Constrained Markov decision processes*, volume 7. CRC Press, 1999.
- [4] Aristotle Arapostathis, Vivek S Borkar, Emmanuel Fernández-Gaucherand, Mrinal K Ghosh, and Steven I Marcus. Discrete-time controlled markov processes with average cost criterion: A survey. *SIAM Journal on Control and Optimization*, 31(2):282–344, 1993.
- [5] Thomas W Archibald, DP Black, and Kevin D Glazebrook. Indexability and index heuristics for a simple class of inventory routing problems. *Operations research*, 57(2):314–326, 2009.
- [6] K Avrachenkov, VS Borkar, and S Pattathil. Controlling g-aimd using index policy. In *The 56th IEEE Conference on Decision and Control, Melbourne, December*, pages 12–15, 2017.

- [7] Konstantin Avrachenkov, Urtzi Ayesta, Josu Doncel, and Peter Jacko. Congestion control of tcp flows in internet routers by means of index policy. *Computer Networks*, 57(17):3463–3478, 2013.
- [8] Konstantin E Avrachenkov and Vivek S Borkar. Whittle index based q-learning for restless bandits with average reward. *Automatica*, 139:110186, 2022.
- [9] Saeed Bagheri and Anna Scaglione. The restless multi-armed bandit formulation of the cognitive compressive sensing problem. *IEEE Transactions on Signal Processing*, 63(5):1183–1198, 2015.
- [10] Richard Bellman. *Dynamic Programming*. Princeton University Press, USA, 2010.
- [11] Bernard Bercu, Bernard Delyon, and Emmanuel Rio. *Concentration inequalities for sums and martingales*. Springer, 2015.
- [12] Dimitri P Bertsekas. *Dynamic Programming and Optimal Control*, volume 1. Athena Scientific Belmont, MA, 1995.
- [13] Dimitris Bertsimas and José Niño-Mora. Restless Bandits, Linear Programming Relaxations, and A Primal-Dual Index Heuristic. *Operations Research*, 48(1):80–90, 2000.
- [14] Biswarup Bhattacharya. Restless bandits visiting villages: A preliminary study on distributing public health services. In *Proceedings of the 1st ACM SIGCAS Conference on Computing and Sustainable Societies*, pages 1–8, 2018.
- [15] Arpita Biswas, Gaurav Aggarwal, Pradeep Varakantham, and Milind Tambe. Learn to intervene: An adaptive learning policy for restless bandits in application to preventive healthcare. In *Proc. of IJCAI*, 2021.
- [16] Vivek S Borkar and Sarath Pattathil. Whittle indexability in egalitarian processor sharing systems. *Annals of Operations Research*, pages 1–21, 2017.
- [17] Vivek S Borkar, K Ravikumar, and Krishnakant Saboo. An index policy for dynamic pricing in cloud computing under price commitments. *Applicationes Mathematicae*, 44:215–245, 2017.
- [18] C Richard Cassady and Erhan Kutanoglu. Integrating preventive maintenance planning and production scheduling for a single machine. *IEEE Transactions on reliability*, 54(2):304–309, 2005.
- [19] Erhan Cinlar. Introduction to stochastic processes prentice-hall. *Englewood Cliffs, New Jersey (420p)*, 1975.
- [20] Kobi Cohen, Qing Zhao, and Anna Scaglione. Restless multi-armed bandits under time-varying activation constraints for dynamic spectrum access. In *2014 48th Asilomar Conference on Signals, Systems and Computers*, pages 1575–1578. IEEE, 2014.
- [21] Wenhan Dai, Yi Gai, Bhaskar Krishnamachari, and Qing Zhao. The Non-Bayesian Restless Multi-Armed Bandit: A Case of Near-Logarithmic Regret. In *Proc. of IEEE ICASSP*, 2011.
- [22] Christoph Dann, Tor Lattimore, and Emma Brunskill. Unifying pac and regret: Uniform pac bounds for episodic reinforcement learning. *Advances in Neural Information Processing Systems*, 30, 2017.
- [23] Sarang Deo, Seyed Iravani, Tingting Jiang, Karen Smilowitz, and Stephen Samuelson. Improving Health Outcomes Through Better Capacity Allocation in A Community-based Chronic Care Model. *Operations Research*, 61(6):1277–1294, 2013.
- [24] Santiago Duran and Ina Maria Verloop. Asymptotic optimal control of markov-modulated restless bandits. *Proceedings of the ACM on Measurement and Analysis of Computing Systems*, 2(1):1–25, 2018.
- [25] Jing Fu, Yoni Nazarathy, Sarat Moka, and Peter G Taylor. Towards q-learning the whittle index for restless bandits. In *2019 Australian & New Zealand Control Conference (ANZCC)*, pages 249–254. IEEE, 2019.

- [26] Aurélien Garivier, Tor Lattimore, and Emilie Kaufmann. On explore-then-commit strategies. *Advances in Neural Information Processing Systems*, 29, 2016.
- [27] Nicolas Gast and Gaujal Bruno. A mean field model of work stealing in large-scale systems. *ACM SIGMETRICS Performance Evaluation Review*, 38(1):13–24, 2010.
- [28] Kevin D Glazebrook, David J Hodge, and Chris Kirkbride. General notions of indexability for queueing control and asset management. *The Annals of Applied Probability*, 21(3):876–907, 2011.
- [29] Aria HasanzadeZonuzi, Dileep Kalathil, and Srinivas Shakkottai. Learning with Safety Constraints: Sample Complexity of Reinforcement Learning for Constrained MDPs. In *Proc. of AAAI*, 2021.
- [30] Aria HasanzadeZonuzi, Dileep Kalathil, and Srinivas Shakkottai. Model-based reinforcement learning for infinite-horizon discounted constrained markov decision processes. In *Proc. of IJCAI*, 2021.
- [31] David J Hodge and Kevin D Glazebrook. On the asymptotic optimality of greedy index heuristics for multi-action restless bandits. *Advances in Applied Probability*, 47(3):652–667, 2015.
- [32] DJ Hodge and Kevin D Glazebrook. Dynamic Resource Allocation In A Multi-Product Make-to-Stock Production System. *Queueing Systems*, 67(4):333–364, 2011.
- [33] Wassily Hoeffding. Probability Inequalities for Sums of Bounded Random Variables. In *The Collected Works of Wassily Hoeffding*, pages 409–426. Springer, 1994.
- [34] Weici Hu and Peter Frazier. An Asymptotically Optimal Index Policy for Finite-Horizon Restless Bandits. *arXiv preprint arXiv:1707.00205*, 2017.
- [35] Peter Jacko. Restless Bandits Approach to the Job Scheduling Problem and Its Extensions. *Modern trends in controlled stochastic processes: theory and applications*, pages 248–267, 2010.
- [36] Thomas Jaksch, Ronald Ortner, and Peter Auer. Near-Optimal Regret Bounds for Reinforcement Learning. *Journal of Machine Learning Research*, 11(4), 2010.
- [37] Young Hun Jung, Marc Abeille, and Ambuj Tewari. Thompson Sampling in Non-Episodic Restless Bandits. *arXiv preprint arXiv:1910.05654*, 2019.
- [38] Young Hun Jung and Ambuj Tewari. Regret Bounds for Thompson Sampling in Episodic Restless Bandit Problems. *Proc. of NeurIPS*, 2019.
- [39] Jackson A Killian, Arpita Biswas, Sanket Shah, and Milind Tambe. Q-learning lagrange policies for multi-action restless bandits. In *Proceedings of the 27th ACM SIGKDD Conference on Knowledge Discovery & Data Mining*, pages 871–881, 2021.
- [40] Jackson A Killian, Andrew Perrault, and Milind Tambe. Beyond" To Act or Not to Act": Fast Lagrangian Approaches to General Multi-Action Restless Bandits. In *Proc. of AAMAS*, 2021.
- [41] Maialen Larrañaga, Urtzi Ayesta, and Ina Maria Verloop. Index Policies for A Multi-Class Queue with Convex Holding Cost and Abandonments. In *Proc. of ACM Sigmetrics*, 2014.
- [42] Maialen Larrañaga, Urtzi Ayesta, and Ina Maria Verloop. Dynamic Control of Birth-and-Death Restless Bandits: Application to Resource-Allocation Problems. *IEEE/ACM Transactions on Networking*, 24(6):3812–3825, 2016.
- [43] Tor Lattimore and Csaba Szepesvári. *Bandit Algorithms*. Cambridge University Press, 2020.
- [44] Elliot Lee, Mariel S Lavieri, and Michael Volk. Optimal Screening for Hepatocellular Carcinoma: A Restless Bandit Model. *Manufacturing & Service Operations Management*, 21(1):198–212, 2019.

- [45] Haoyang Liu, Keqin Liu, and Qing Zhao. Logarithmic Weak Regret of Non-Bayesian Restless Multi-Armed Bandit. In *Proc of IEEE ICASSP*, 2011.
- [46] Haoyang Liu, Keqin Liu, and Qing Zhao. Learning in A Changing World: Restless Multi-Armed Bandit with Unknown Dynamics. *IEEE Transactions on Information Theory*, 59(3):1902–1916, 2012.
- [47] Aditya Mate, Jackson Killian, Haifeng Xu, Andrew Perrault, and Milind Tambe. Collapsing bandits and their application to public health intervention. *Advances in Neural Information Processing Systems*, 33:15639–15650, 2020.
- [48] Aditya Mate, Andrew Perrault, and Milind Tambe. Risk-Aware Interventions in Public Health: Planning with Restless Multi-Armed Bandits. In *Proc.of AAMAS*, 2021.
- [49] Andreas Maurer and Massimiliano Pontil. Empirical Bernstein Bounds and Sample Variance Penalization. *arXiv preprint arXiv:0907.3740*, 2009.
- [50] Khaled Nakhleh, Santosh Ganji, Ping-Chun Hsieh, I Hou, Srinivas Shakkottai, et al. Neurwin: Neural whittle index network for restless bandits via deep rl. *Advances in Neural Information Processing Systems*, 34, 2021.
- [51] José Niño-Mora. Dynamic Priority Allocation via Restless Bandit Marginal Productivity Indices. *Top*, 15(2):161–198, 2007.
- [52] José Niño-Mora. Admission and routing of soft real-time jobs to multiclusters: Design and comparison of index policies. *Computers & operations research*, 39(12):3431–3444, 2012.
- [53] Ronald Ortner, Daniil Ryabko, Peter Auer, and Rémi Munos. Regret Bounds for Restless Markov Bandits. In *Proc. of Algorithmic Learning Theory*, 2012.
- [54] Christos H Papadimitriou and John N Tsitsiklis. The Complexity of Optimal Queueing Network Control. In *Proc. of IEEE Conference on Structure in Complexity Theory*, 1994.
- [55] Martin L Puterman. *Markov Decision Processes: Discrete Stochastic Dynamic Programming*. John Wiley & Sons, 1994.
- [56] Francisco Robledo, Vivek Borkar, Urtzi Ayesta, and Konstantin Avrachenkov. QWI: Q-Learning with Whittle Index. *ACM SIGMETRICS Performance Evaluation Review*, 49(2):47–50, 2022.
- [57] Shang-Pin Sheng, Mingyan Liu, and Romesh Saigal. Data-Driven Channel Modeling Using Spectrum Measurement. *IEEE Transactions on Mobile Computing*, 14(9):1794–1805, 2014.
- [58] Albert N Shiryaev. *Optimal Stopping Rules*, volume 8. Springer Science & Business Media, 2007.
- [59] Cem Tekin and Mingyan Liu. Adaptive Learning of Uncontrolled Restless Bandits with Logarithmic Regret. In *Proc. of Allerton*, 2011.
- [60] Cem Tekin and Mingyan Liu. Online Learning of Rested and Restless Bandits. *IEEE Transactions on Information Theory*, 58(8):5588–5611, 2012.
- [61] Ina Maria Verloop. Asymptotically Optimal Priority Policies for Indexable and Nonindexable Restless Bandits. *The Annals of Applied Probability*, 26(4):1947–1995, 2016.
- [62] Siwei Wang, Longbo Huang, and John Lui. Restless-UCB, an Efficient and Low-complexity Algorithm for Online Restless Bandits. In *Proc. of NeurIPS*, 2020.
- [63] Richard R Weber and Gideon Weiss. On An Index Policy for Restless Bandits. *Journal of applied probability*, pages 637–648, 1990.
- [64] Peter Whittle. Restless Bandits: Activity Allocation in A Changing World. *Journal of applied probability*, pages 287–298, 1988.
- [65] Guojun Xiong, Jian Li, and Rahul Singh. Reinforcement Learning Augmented Asymptotically Optimal Index Policy for Finite-Horizon Restless Bandits. In *Proc. of AAAI*, 2022.

- [66] Guojun Xiong, Xudong Qin, Bin Li, Rahul Singh, and Jian Li. Index-aware Reinforcement Learning for Adaptive Video Streaming at the Wireless Edge. In *Proc. of ACM MobiHoc*, 2022.
- [67] Guojun Xiong, Shufan Wang, Gang Yan, and Jian Li. Reinforcement Learning for Dynamic Dimensioning of Cloud Caches: A Restless Bandit Approach. In *Proc. of IEEE INFOCOM*, 2022.
- [68] Zhe Yu, Yunjian Xu, and Lang Tong. Deadline Scheduling as Restless Bandits. *IEEE Transactions on Automatic Control*, 63(8):2343–2358, 2018.
- [69] Gabriel Zayas-Cabán, Stefanus Jasin, and Guihua Wang. An Asymptotically Optimal Heuristic for General Nonstationary Finite-Horizon Restless Multi-Armed, Multi-Action Bandits. *Advances in Applied Probability*, 51(3):745–772, 2019.
- [70] Xiangyu Zhang and Peter I Frazier. Restless bandits with many arms: Beating the central limit theorem. *arXiv preprint arXiv:2107.11911*, 2021.
- [71] Qing Zhao, Bhaskar Krishnamachari, and Keqin Liu. On myopic sensing for multi-channel opportunistic access: structure, optimality, and performance. *IEEE Transactions on Wireless Communications*, 7(12):5431–5440, 2008.
- [72] Yihan Zou, Kwang Taik Kim, Xiaojun Lin, and Mung Chiang. Minimizing Age-of-Information in Heterogeneous Multi-Channel Systems: A New Partial-Index Approach. In *Proc. of ACM MobiHoc*, 2021.

## Ethics Statement and Societal Impacts

Our research shows how our proposed two low-complexity index-aware RL algorithms, GM-R2MAB and UC-R2MAB perform in the setting of online infinite-horizon average-reward restless multi-action multi-armed bandits. Our main contributions are primarily analytic in nature, i.e., mainly in the theory part. The evaluation of our algorithms are conducted through a combination of mathematical analysis (e.g., finite-time analysis) and simulations. For sake of exposition and reproducibility, we leveraged a public dataset of the TB care in India [40], which are interpreted and leveraged without specialist medical-care domain knowledge, and without private human information (patients are divided into four types with a ratio, and other parameters are synthetic). However, the proposed methods are potentially relevant to any scientific application that can be formulated as a R2MAB framework. As for societal impact of our work, we highlight the need for specific information about involved individuals, or network metadata, which may lead to privacy issues and we hope to raise awareness of these potential issues of privacy.

One limitation of the method may come from the above discussions regarding the technical assumption of “global attractor” to prove the asymptotic optimality of ERC index policy. Though this is a standard assumption and widely used in the literature, it is hard to be established analytically. A possible direction or an open problem is to establish a sufficient condition to rigorously establish the global attractor property.

## Checklist

1. For all authors...
  - (a) Do the main claims made in the abstract and introduction accurately reflect the paper’s contributions and scope? [\[Yes\]](#)
  - (b) Did you describe the limitations of your work? [\[Yes\]](#)
  - (c) Did you discuss any potential negative societal impacts of your work? [\[Yes\]](#)
  - (d) Have you read the ethics review guidelines and ensured that your paper conforms to them? [\[Yes\]](#)
2. If you are including theoretical results...
  - (a) Did you state the full set of assumptions of all theoretical results? [\[Yes\]](#)
  - (b) Did you include complete proofs of all theoretical results? [\[Yes\]](#)

3. If you ran experiments...
  - (a) Did you include the code, data, and instructions needed to reproduce the main experimental results (either in the supplemental material or as a URL)? [\[Yes\]](#)
  - (b) Did you specify all the training details (e.g., data splits, hyperparameters, how they were chosen)? [\[Yes\]](#)
  - (c) Did you report error bars (e.g., with respect to the random seed after running experiments multiple times)? [\[Yes\]](#)
  - (d) Did you include the total amount of compute and the type of resources used (e.g., type of GPUs, internal cluster, or cloud provider)? [\[N/A\]](#)
4. If you are using existing assets (e.g., code, data, models) or curating/releasing new assets...
  - (a) If your work uses existing assets, did you cite the creators? [\[Yes\]](#)
  - (b) Did you mention the license of the assets? [\[N/A\]](#)
  - (c) Did you include any new assets either in the supplemental material or as a URL? [\[N/A\]](#)
  - (d) Did you discuss whether and how consent was obtained from people whose data you're using/curating? [\[Yes\]](#)
  - (e) Did you discuss whether the data you are using/curating contains personally identifiable information or offensive content? [\[N/A\]](#)
5. If you used crowdsourcing or conducted research with human subjects...
  - (a) Did you include the full text of instructions given to participants and screenshots, if applicable? [\[N/A\]](#)
  - (b) Did you describe any potential participant risks, with links to Institutional Review Board (IRB) approvals, if applicable? [\[N/A\]](#)
  - (c) Did you include the estimated hourly wage paid to participants and the total amount spent on participant compensation? [\[N/A\]](#)

## A Extended Linear Programming (ELP)

In this section, we present the auxiliary formulation of the extended LP (**ELP**). As claimed in the main paper, an **ELP** serves as a proxy to solve (8) and (11). The **ELP** leverages the state-action-state occupancy measure  $z_n(s, a, s')$  defined as  $z_n(s, a, s') = P_n(s'|s, a)\omega_n(s, a)$  to express the confidence intervals of the transition probabilities. Specifically, the **ELP**( $\mathcal{M}$ ) for GM-R2MAB in (8) is defined over  $z$  as follows:

$$\begin{aligned}
\mathbf{ELP}(\mathcal{M}) : \quad & \max_{M_n \in \mathcal{M}, \forall n} \sum_{n=1}^N \sum_{(s,a) \in \mathcal{S} \times \mathcal{A}} \sum_{s' \in \mathcal{S}} z_n(s, a, s') \tilde{r}_n(s, a) \\
\text{subject to} \quad & \sum_{n=1}^N \sum_{(s,a) \in \mathcal{S} \times \mathcal{A}} \sum_{s' \in \mathcal{S}} a z_n(s, a, s') \leq B, \\
& \sum_{(s',a) \in \mathcal{S} \times \mathcal{A}} z_n(s, a, s') = \sum_{(s',a') \in \mathcal{S} \times \mathcal{A}} z_n(s', a', s), \quad \forall n \in \mathcal{N}, \\
& \sum_{(s,a) \in \mathcal{S} \times \mathcal{A}} \sum_{s' \in \mathcal{S}} z_n(s, a, s') = 1, \quad \forall n \in \mathcal{N}, \\
& \frac{z_n(s, a, s')}{\sum_y z_n(s, a, y)} - (\hat{P}_n(s'|s, a) + \delta_n(s, a)) \leq 0, \\
& -\frac{z_n(s, a, s')}{\sum_y z_n(s, a, y)} + (\hat{P}_n(s'|s, a) - \delta_n(s, a)) \leq 0.
\end{aligned}$$

The first three constraints directly come from (3)-(5) by substituting the state-action occupancy measure  $\{\omega_n(s, a), \forall s, a, n\}$  by the state-action-state occupancy measure  $\{z_n(s, a, s'), \forall s, a, s', n\}$ . The last two constraints enforce that the transition probabilities should be inside of the confidence ball  $\mathcal{M} = \{M_n = (\mathcal{S}, \mathcal{A}, \hat{P}_n, \tilde{r}_n) : |\hat{P}_n(s'|s, a) - \tilde{P}_n(s'|s, a)| \leq \delta, \tilde{r}_n(s, a) = \hat{r}_n(s, a) + \delta, \forall n, s, a\}$  as defined in (7). The **ELP** for solving UC-R2MAB in (11) at each episode is same as **ELP**( $\mathcal{M}$ ) except for replacing  $\mathcal{M}$  to  $\mathcal{M}^k$ .

## B Proofs in Section 3

In this section, we prove Lemma 1 and Theorem 1 of our proposed ERC index policy in Section 3. To prove Lemma 1, we first show the feasibility of the LP in (2)-(5).

### B.1 Feasibility of LP in (2)-(5)

Since the LP in (2)-(5) is invariant with a scaling factor  $\rho > 0$ , we define  $X_n^\rho(s, a) := \rho\omega_n(s, a)$  as the average number of class- $n$  arms in state  $s$  taking action  $a$  for the scaled system, and let  $x_n^\rho(s, a; t)$  as the fluid process of  $X_n^\rho(s, a)$  at time  $t$ .

If there exists a policy  $\pi$  such that the stochastic fluid process  $x_n^\rho(s, a; t)$  has a unique invariant probability distribution with finite first moments, then the feasible set of LP in (2)-(5) is non-empty. We denote the optimal solution to the LP (2)-(5) as  $\Omega_{\pi^*} = \{\omega_n^*(s, a) : n \in \mathcal{N}, s \in \mathcal{S}, a \in \mathcal{A}\}$ , and the corresponding optimal value as  $V^* := \sum_{n=1}^N \sum_{(s,a)} \omega_n^*(s, a) r_n(s, a)$  such that  $V^* > -\infty$ .

*Proof.* We denote  $\int_{\tau=0}^t x_n^\rho(s, a; \tau) d\tau$  as the total aggregated amount of fluid on action  $a$  in state  $s$  for class- $n$  arms during the interval  $(0, t]$ . Then we can write the following sample-path construction of process  $x_n^\rho(s; t) := \sum_a x_n^\rho(s, a; t)$ :

$$x_n^\rho(s; t) = x_n^\rho(s; 0) + \underbrace{\sum_{(s',a') \in \mathcal{S} \times \mathcal{A}} Z^{\lambda_n(s',a',s)}(t) \int_{\tau=0}^t x_n^\rho(s'; \tau) d\tau}_{\text{fluid in}}$$

$$- \underbrace{\sum_{(s',a) \in \mathcal{S} \times \mathcal{A}} Z^{\lambda_n(s,a,s')}(t) \int_{\tau=0}^t x_n^\rho(s;\tau) d\tau}_{\text{fluid out}}, \quad \forall n \in \mathcal{N}, \quad (13)$$

where  $Z^{\lambda_n(s',a',s)}(t)$  are Poisson processes with rate  $\lambda_n(s',a',s)$ . Specifically,  $\lambda_n(s',a',s)$  represents the transition rate for class- $n$  arm from state  $s'$  to state  $s$  when action  $a$  is taken. The ergodic theorem [19] indicates that

$$\lim_{T \rightarrow \infty} \frac{1}{T} \int_0^T x_n^\rho(s,a;\tau) d\tau = X_n^\rho(s,a) = \rho \omega_n(s,a) > -\infty.$$

In addition, we have  $Z^{\lambda_n(s,a,s')}(t)/t \rightarrow \lambda_n(s,a,s') \propto P_n(s,a,s')$  as  $t \rightarrow \infty$ , which is proportion to  $P_n(s,a,s')$ . Therefore, diving  $t^2$  to both sides of (13), we have

$$\begin{aligned} 0 &= \sum_{(s',a') \in \mathcal{S} \times \mathcal{A}} P_n(s',a,s) \omega_n(s',a) - \sum_{(s',a) \in \mathcal{S} \times \mathcal{A}} P_n(s,a,s') \omega_n(s,a) \\ &= \sum_{(s',a') \in \mathcal{S} \times \mathcal{A}} P_n(s',a,s) \omega_n(s',a) - \sum_a \omega_n(s,a), \end{aligned}$$

from which we obtain the constraint in (4). Hence, the feasible region is not empty and thus there exists optimal solution such that  $V^* > -\infty$ .  $\square$

## B.2 Proof of Lemma 1

**Lemma 2.** *The optimal value achieved by LP in (2)-(5) is an upper bound of that of R2MAB in (1).*

*Proof.* According to [3], the LP in (2)-(5) is equivalent to the relaxed problem in Section 3. It is sufficient to show that the relaxed problem achieves no less average reward than the original problem in (1). The proof is straightforward since the constraints in the relaxed problem expand the feasible region of the original problem R2MAB in (1). Denote the feasible region of the original problem as

$$\Gamma := \left\{ a_n(t), \forall t \left| \sum_{n=1}^N a_n(t) \leq B \right. \right\},$$

and the feasible region of the relaxed problem as

$$\Gamma' := \left\{ a_n(t), \forall t \left| \limsup_{T \rightarrow \infty} \frac{1}{T} \mathbb{E} \left\{ \int_{t=1}^T \sum_{n=1}^N a_n(t) dt \right\} \leq B \right. \right\}.$$

It is clear that the relaxed problem expands the feasible region of original problem in (1), i.e.,  $\Gamma \subseteq \Gamma'$ . Therefore, the relaxed problem achieves an objective value no less than that of the original problem in (1) because the original optimal solution is also inside the relaxed feasibility set. This indicates the LP in (2)-(5) achieves an optimal value no less than that of (1).  $\square$

## B.3 Proof of Theorem 1

We define the expected long-term average reward with scaling parameter  $\rho$  as

$$V_{\pi^*}^\rho := \liminf_{T \rightarrow \infty} \frac{1}{T} \mathbb{E}_{\pi^*} \left( \int_{t=1}^T \sum_{n=1}^N \sum_{(s,a)} r_n(s,a) \frac{X_n^\rho(\pi^*, s, a; t)}{\rho} dt \right).$$

**Theorem 4.** *The proposed ERC index policy  $\pi^*$  is asymptotically optimal under the global attractor condition in Definition 1. Specifically,*

$$\lim_{\rho \rightarrow \infty} V_{\pi^*}^\rho - V_{\pi^{opt}}^\rho = 0,$$

where  $\pi^{opt}$  represents the optimal policy for R2MAB in (1).

The key of this proof relies on showing that the fluid process  $\frac{X^\rho(\pi^*;t)}{\rho}$  converges to  $\{\omega_n^*, \forall n\}$  under the proposed ERC index policy  $\pi^*$  when  $\rho \rightarrow \infty$ . Since the  $\{\omega_n^*, \forall n\}$  is an optimal solution of the LP, according to Lemma 2, the proposed ERC index policy  $\pi^*$  achieves no worse average reward compared to the optimal policy  $\pi^{opt}$ , i.e.,  $\lim_{\rho \rightarrow \infty} V_{\pi^*}^\rho - V_{\pi^{opt}}^\rho \geq 0$ . On the other hand, it is always true that  $\lim_{\rho \rightarrow \infty} V_{\pi^*}^\rho - V_{\pi^{opt}}^\rho \leq 0$  by the definition of  $\pi^{opt}$ . This will give rise to the desired result. To prove Theorem 1, we first introduce some auxiliary definition and lemmas.

**Definition 4** (Density dependent population process [27]). *A sequence of Markov process  $X^\rho$  on  $\frac{1}{\rho}\mathbb{N}^d$  ( $d \geq 1$ ) is called a density dependent population process if there exists a finite number of transitions, say  $\mathcal{L} \subset \mathbb{N}^d$ , such that for each  $\ell \in \mathcal{L}$ , the rate of transition from  $X^\rho$  to  $X^\rho + \ell/\rho$  is  $\rho f_\ell(X^\rho)$ , where  $f_\ell(\cdot)$  does not depend on  $\rho$ .*

To show the convergence of the density dependent population process, we consider  $F$  the function  $F(x) = \sum_{\ell \in \mathcal{L}} \ell f_\ell(x)$  and the following ordinary differential equation  $x(0) = x_0$  and  $\dot{x}_0(t) = F(x_0(t))$ . The following lemma shows that the stochastic process  $X^\rho(t)$  converges to the deterministic  $x(t)$ .

**Lemma 3.** [27] *Assume for all compact set  $E \subset \mathbb{R}^d$ ,  $\sum_{\ell} |\ell| \sup_x f_\ell(x) < \infty$ , and  $F$  is Lipschitz on  $E$ . If  $\lim_{\rho \rightarrow \infty} X^\rho(0) = x_0$  in probability, then for all  $t > 0$ :*

$$\lim_{\rho \rightarrow \infty} \sup_{s \leq t} |X^\rho(s) - x(s)| = 0, \text{ in probability.}$$

The following lemma shows that under the global attractor property of function  $F$ , the stationary distribution of the stochastic density population process converges to the dirac measure of the global attractor.

**Lemma 4.** [27] *If  $F$  has a unique stationary point  $x^*$  to which all trajectories converge, then the stationary measures  $\zeta^\rho$  concentrate around  $x^*$  as  $\rho$  goes to infinity:*

$$\lim_{\rho \rightarrow \infty} \zeta^\rho \rightarrow \delta_{x^*},$$

where  $\delta_{x^*}$  is the dirac measure in  $x^*$ .

Provided these lemmas, we are now ready to prove Theorem 4.

*Proof.* We denote  $A_n^{\pi^*}(s)$  as the set of all combinations  $(m, j)$ ,  $m \in \mathcal{N}$ ,  $j \in \mathcal{S}$  such that class- $m$  arms in state  $j$  have larger indices than those of class- $n$  arms in state  $s$  under the ERC index policy  $\pi^*$ . The transition rates of the process  $X^\rho(\pi^*; t)/\rho$  are then defined as

$$x \rightarrow x - \frac{e_{n,s}}{\rho} + \frac{e_{n,s'}}{\rho} \text{ at rate } \sum_a P_n(s, a, s') x_n^\rho(s, a), \quad (14)$$

where  $\sum_{a \in \mathcal{A} \setminus \{0\}} a x_n^\rho(s, a) = \min \left( \rho B - \sum_{(m,j) \in A_n^{\pi^*}(s)} \sum_{a \in \mathcal{A} \setminus \{0\}} a x_m^\rho(j, a), 0 \right)$ , and  $e_{n,s} \in \mathbb{R}^{S \times 1}$  is unit vector with the  $s$ -th position being 1.

It follows that there exists a continuous function  $f_\ell(x)$  to model the transition rate of the process  $X^\rho(\pi^*; t)$  from state  $x$  to  $x + \ell/\rho$ ,  $\forall \ell \in \mathcal{L}$  according to (14), with  $\mathcal{L}$  being the set composed of a finite number of vectors in  $\mathbb{N}^{SN}$ . Hence, the process  $X^\rho(\pi^*; t)/\rho$  is a density dependent population processes according to Definition 4.

Note that the process  $X^\rho(\pi^*; t)$  can be expressed

$$\frac{dX^\rho(\pi^*; t)}{dt} = F(X^\rho(\pi^*; t)),$$

with  $F(\cdot)$  being Lipschitz continuous and satisfying  $F(X^\rho(\pi^*; t)) = \sum_{\ell \in \mathcal{L}} \ell f_\ell(X^\rho(\pi^*; t))$ . Under the condition that the considered MDP is unichain, such that the process  $\frac{X^\rho(\pi^*; t)}{\rho}$  has a unique invariant probability distribution  $\zeta_{\pi^*}^\rho$ , which is tight [61]. Thus, we have  $\zeta_{\pi^*}^\rho \left( \frac{X^\rho(\pi^*; t)}{\rho} \right)$  converge to the Dirac measure in  $X^{\rho,*}/\rho$  when  $\rho \rightarrow \infty$ , which is a global attractor of  $\frac{X^\rho(\pi^*; t)}{\rho}$  according to Lemma 4. Therefore, according to the ergodicity theorem [19], we have

$$\lim_{\rho \rightarrow \infty} V_{\pi^*}^\rho = \lim_{\rho \rightarrow \infty} \sum_{n=1}^N \sum_{(s,a) \in \mathcal{S} \times \mathcal{A}} \sum_{\frac{X^\rho(\pi^*, s, a)}{\rho} \in \mathcal{X}} \zeta_{\pi^*}^\rho \left( \frac{X_n^\rho(\pi^*, s, a)}{\rho} \right) r_n(s, a) \frac{X_n^\rho(\pi^*, s, a)}{\rho}$$

$$\begin{aligned}
&= \sum_{n=1}^N \sum_{(s,a) \in \mathcal{S} \times \mathcal{A}} r_n(s, a) \omega_n^*(s, a) \\
&\geq \lim_{\rho \rightarrow \infty} V_{\pi^{opt}}^\rho,
\end{aligned}$$

where the second equality is due to the fact that  $\zeta_{\pi^*}^\rho \left( \frac{X_n^\rho(\pi^*, s, a)}{\rho} \right)$  converges to the Dirac measure in  $X^{\rho, \star} / \rho$  when  $\rho \rightarrow \infty$  under the global attractor condition.  $\square$

## C Proof of Theorem 2

In this section, we prove the regret of GM-R2MAB in Theorem 2. The “explore-then-commit” structure of GM-R2MAB enables us to decompose the regret  $\text{Reg}(\pi^*, T)$  into the exploration phase and the exploitation phase. To this end, we divide the total time horizon  $T$  into the exploration part  $T_1$  and the exploitation part  $T_2$ , respectively, i.e.,  $T = T_1 + T_2$ . Then the total regret can be expressed as

$$\text{Reg}(\pi^*, T) = \text{Reg}(T_1) + \text{Reg}(\pi^*, T_2).$$

In the following, we derive the regrets for these two parts, respectively.

### C.1 The Regret of the Exploration Phase

In the exploration phase, each state-action pair  $(s, a)$  for each arm  $n$  is sampled for  $J(T)$  times according to a generative model. To this end, we can easily bound the regret of the exploration phase  $\text{Reg}(T_1)$  since the gap between the optimal policy and the random policy at each time is bounded, which as presented in the following lemma.

**Lemma 5.** *Since the reward is bounded and not greater than one, the regret in the exploration phase can be bounded as*

$$\text{Reg}(T_1) = \mathcal{O}(SABJ(T)).$$

*Proof.* The result directly follows from the subsequent two facts. First, there are  $N$  arms with a total number of state-action pairs  $SA$  and to guarantee each state-action pair being sampled for  $J(T)$  times, it requires  $SAJ(T)$  activation resource. Second, at any moment in time, a maximum number of active arms will not exceed  $B$ .  $\square$

### C.2 The Regret of the Exploitation Phase

The regret of the exploitation phase characterizes the accumulated reward gap when the optimal policy  $\pi^{opt}$  and the learned policy  $\pi^*$  are executed, respectively, which is defined as

$$\text{Reg}(\pi^*, T_2) := \mathbb{E}[R(\pi^{opt}, T_2)] - \mathbb{E}[R(\pi^*, T_2)].$$

During the exploitation phase, two possible and disjoint events can occur. The first event is called *the failure event*, which occurs when the true MDPs  $\{M_n\}$  lie outside the plausible MDPs set  $\mathcal{M}$  that we construct in line 4 of GM-R2MAB, i.e., in (7). The second event is called *the good event* when the true MDPs  $\{M_n\}$  lie inside the plausible MDPs set  $\mathcal{M}$ . Therefore, the regret of the exploitation phase can be decomposed into two parts as follows

$$\text{Reg}(\pi^*, T_2) = \text{Reg}(\pi^*, T_2) \mathbb{E}[\mathbb{1}(\{M_n\} \notin \mathcal{M})] + \text{Reg}(\pi^*, T_2) \mathbb{E}[\mathbb{1}(\{M_n\} \in \mathcal{M})].$$

#### C.2.1 Regret Conditioned on the Failure Event

Specifically, we define the failure events as follows:

$$\mathcal{E}_p := \{\exists(s, a), n, |P_n(s'|s, a) - \hat{P}_n(s'|s, a)| > \delta\},$$

and

$$\mathcal{E}_r := \{\exists(s, a), n, |\bar{r}_n(s, a) - \hat{r}_n(s, a)| > \delta\},$$

which indicate that the true parameters are outside the confidence intervals. We denote the correspondingly complementary events as  $\mathcal{E}_p^c$  and  $\mathcal{E}_r^c$ , respectively. Therefore, we have  $\{M_n\} \notin \mathcal{M} := \mathcal{E}_p \cup \mathcal{E}_r$ ,  $\{M_n\} \in \mathcal{M} := \mathcal{E}_p^c \cap \mathcal{E}_r^c$ . Given these, we first characterize the probability that the failure event occurs.

**Lemma 6.** *Provided that  $\delta := \sqrt{\frac{1}{2J(T)} \log \left( \frac{2SANJ(T)}{\eta} \right)}$ , we have*

$$Pr(\{M_n\} \notin \mathcal{M}) \leq \frac{\eta}{J(T)}.$$

*Proof.* By Chernoff-Hoeffding inequality [33], we have

$$Pr(|P_n(s'|s, a) - \hat{P}_n(s'|s, a)| > \delta) \leq \frac{\eta}{SANJ(T)}.$$

By leveraging the union bound over all states, actions and number of arms, we have

$$\begin{aligned} Pr(\{M_n\} \notin \mathcal{M}) &\leq \sum_{n=1}^N \sum_{(s,a)} Pr(|P_n(s'|s, a) - \hat{P}_n(s'|s, a)| > \delta) \\ &\quad + \sum_{n=1}^N \sum_{(s,a)} Pr(|\bar{r}_n(s, a) - \hat{r}_n(s, a)| > \delta) \leq \frac{2\eta}{J(T)}. \end{aligned}$$

□

Using Lemma 6, we characterize the regret conditioned on the failure event.

**Lemma 7.** *The regret conditioned on the failure event is given by*

$$Reg(\pi^*, T_2) \mathbb{E}[\mathbb{1}(\{M_n\} \notin \mathcal{M})] \leq \frac{2BT_2\eta}{J(T)}.$$

*Proof.* According to Lemma 6, we have

$$Reg(\pi^*, T_2) \mathbb{E}[\mathbb{1}(\{M_n\} \notin \mathcal{M})] \leq BT_2 \mathbb{E}[\mathbb{1}(\{M_n\} \notin \mathcal{M})] \leq \frac{2BT_2\eta}{J(T)},$$

where the first inequality comes from the fact that at any time the regret is upper bounded by  $B$  because a maximum number of  $B$  arms can be pulled at any time. □

### C.2.2 Regrets Conditioned on the Good Event

Provided Lemma 6, we have that the probability that the true MDP is inside the plausible MDPs set, i.e.,  $\{M_n\} \in \mathcal{M}$ , is at least  $1 - \frac{2\eta}{J(T)}$ . Now we consider the regret conditioned on the good event  $\{M_n\} \in \mathcal{M}$ . To characterize the regret, we recap some notations. For ease of readability, we denote the state for all arms as a stacked vector  $\mathbf{s} \in \mathcal{S}^N := [s_1, s_2, \dots, s_N]$ , the corresponding actions under policy  $\pi^*$  as  $\pi^*(\mathbf{s})$ , and the unknown MDPs as  $\Theta := [\theta_1, \theta_2, \dots, \theta_N]$  with  $\theta_n := (P_n, r_n)$ . The transition kernel of the stacked system is then  $P_\Theta(\cdot | \mathbf{s}, \pi^*(\mathbf{s}))$ ,  $\forall \mathbf{s} \in \mathcal{S}^N$ . The ergodicity coefficient [4, 2] of  $P_\Theta$  is  $D_{P_\Theta} := 1 - \min_{\mathbf{s}, \mathbf{s}'} \sum_{\mathbf{z} \in \mathcal{S}^N} \min\{P_\Theta(\mathbf{z} | \mathbf{s}, \pi^*(\mathbf{s})), P_\Theta(\mathbf{z} | \mathbf{s}', \pi^*(\mathbf{s}'))\}$ , and  $D := \sup_{\Theta} D_{P_\Theta}$  as the maximum value. Since the dynamics of the arms are independent, the definition of contraction factor implies that a sufficient condition is that for every arm, and every pair of state-action pairs, there exists a next state that can be reached from both state-action pairs with positive probability in one step.

Let  $\pi_\Theta^*$  denote the proposed ERC index policy corresponding to the transition model  $\Theta$  and  $P_\Theta$  be the controlled transition matrix under policy  $\pi_\Theta^*$ . Denote  $\mu_\Theta$  as the average reward of policy  $\pi_\Theta$  and  $\mu_\Theta$  does not depend on the initial state and satisfy the average reward Bellman equation [3, 55],

$$\mu_\Theta + F_\Theta(\mathbf{s}) = R(\mathbf{s}, \pi_\Theta^*(\mathbf{s})) + [P_\Theta F_\Theta](\mathbf{s}), \quad \forall \mathbf{s} \in \mathcal{S}^N, \quad (15)$$

where  $F_\Theta(\mathbf{s})$  is the relative value function.

**Lemma 8.** [2] *For any  $\Theta$ , we have that  $0 \leq \mu_\Theta \leq B$  and  $\text{span}(F_\Theta) \leq \frac{2B}{1-D}$ .*

Define  $\mu^{opt}$  as the optimal average reward achieved by the optimal policy  $\pi^{opt}$  and  $\mu^*$  as average reward achieved by the learned policy  $\pi^*$  for the true MDP  $\{\mathcal{S}, \mathcal{A}, P_n, r_n, \forall n \in \mathcal{N}\}$ . Define  $\tilde{\mu}^*$  as the optimistic average reward achieved by the learned policy  $\pi^*$  for the optimistic MDP  $\{\tilde{M}_n, \forall n \in \mathcal{N}\}$ . Then we have the following lemma to upper bound the regret conditioned on good event.

**Lemma 9.** *The regret for the exploitation phase conditioned on the good event can be expressed as*

$$\text{Reg}(\pi^*, T_2) \mathbb{E}[\mathbb{1}(\{M_n\} \in \mathcal{M})] \leq \left[ \sum_{t=1}^{T_2} [P_{\tilde{\Theta}} F_{\tilde{\Theta}}](\mathbf{s}_t) - F_{\tilde{\Theta}}(\mathbf{s}_{t+1}) \right] + \frac{2B}{1-D},$$

where  $\tilde{\Theta}$  is the parameter of the optimistic MDP  $\{\tilde{M}_n, \forall n \in \mathcal{N}\}$ .

*Proof.* The proof goes as follows:

$$\begin{aligned} & \text{Reg}(\pi^*, T_2) \mathbb{E}[\mathbb{1}(\{M_n\} \in \mathcal{M})] \\ &= T_2 \mu^{opt} - \sum_{t=1}^{T_2} R(\mathbf{s}(t), \pi^*(\mathbf{s}(t))) \\ &= T_2 \mu^{opt} - T_2 \tilde{\mu}^* + T_2 \tilde{\mu}^* - \sum_{t=1}^{T_2} R(\mathbf{s}(t), \pi^*(\mathbf{s}(t))) \\ &\stackrel{(a)}{\leq} T_2 \tilde{\mu}^* - \sum_{t=1}^{T_2} R(\mathbf{s}(t), \pi^*(\mathbf{s}(t))) \\ &\stackrel{(b)}{=} \sum_{t=1}^{T_2} R(\mathbf{s}(t), \tilde{\pi}^*(\mathbf{s}(t))) + \sum_{t=1}^{T_2} [P_{\tilde{\Theta}} F_{\tilde{\Theta}}](\mathbf{s}_t) - F_{\tilde{\Theta}}(\mathbf{s}_t) - \sum_{t=1}^{T_2} R(\mathbf{s}(t), \pi^*(\mathbf{s}(t))) \\ &\stackrel{(c)}{=} \sum_{t=1}^{T_2} [P_{\tilde{\Theta}} F_{\tilde{\Theta}}](\mathbf{s}_t) - F_{\tilde{\Theta}}(\mathbf{s}_t) \\ &= \sum_{t=1}^{T_2} [P_{\tilde{\Theta}} F_{\tilde{\Theta}}](\mathbf{s}_t) - F_{\tilde{\Theta}}(\mathbf{s}_{t+1}) + F_{\tilde{\Theta}}(\mathbf{s}_{t+1}) - F_{\tilde{\Theta}}(\mathbf{s}_t) \\ &= \sum_{t=1}^{T_2} [P_{\tilde{\Theta}} F_{\tilde{\Theta}}](\mathbf{s}_t) - F_{\tilde{\Theta}}(\mathbf{s}_{t+1}) + F_{\tilde{\Theta}}(\mathbf{s}_{T_2+1}) - F_{\tilde{\Theta}}(\mathbf{s}_1) \\ &\stackrel{(d)}{\leq} \sum_{t=1}^{T_2} [P_{\tilde{\Theta}} F_{\tilde{\Theta}}](\mathbf{s}_t) - F_{\tilde{\Theta}}(\mathbf{s}_{t+1}) + \frac{2B}{1-D}. \end{aligned}$$

The inequality (a) holds due to the fact the optimistic average reward  $\tilde{\mu}^*$  for the optimistic MDPs  $\{\tilde{M}_n\}_{n=1}^N$  is no less than the optimal average reward  $\mu^{opt}$  for the true MDP. (b) directly follows the Bellman equation in (15). (c) is due to the fact that  $\sum_{t=1}^{T_2} R(\mathbf{s}(t), \tilde{\pi}^*(\mathbf{s}(t))) = \sum_{t=1}^{T_2} R(\mathbf{s}(t), \pi^*(\mathbf{s}(t)))$ , and (d) follows from Lemma 8.  $\square$

**Lemma 10** (Azuma-Hoeffding inequality [11]). *Let  $X_1, X_2, \dots$  be a martingale difference sequence with  $|X_i| \leq c$  for all  $i$ . Then for all  $\epsilon > 0$*

$$\Pr \left( \sum_{i=1}^n X_i > \epsilon \right) \leq \exp \left( -\frac{\epsilon^2}{2nc^2} \right).$$

We are now ready to characterize the regret conditioned on the good event.

**Lemma 11.** *Conditioned on the good event, the regret is given by*

$$\text{Reg}(\pi^*, T_2) \mathbb{E}[\mathbb{1}(\{M_n\} \in \mathcal{M})] = \mathcal{O} \left( \frac{BN}{1-D} \sqrt{T \log \frac{4SNAT}{\eta}} \right),$$

with a probability larger than  $1 - (\frac{\eta}{4SNAT})^{\frac{1}{2}}$ .

*Proof.* Define  $X_t = \mathbb{E} [[P_{\tilde{\Theta}} F_{\tilde{\Theta}}](\mathbf{s}_t) - F_{\tilde{\Theta}}(\mathbf{s}_{t+1})]$ . We have

$$\text{Reg}(\pi^*, T_2) \leq \sum_{t=1}^{T_2} X_t.$$

Due to the fact that

$$\mathbb{E}[[P_{\tilde{\Theta}}F_{\tilde{\Theta}}](\mathbf{s}_t) - F_{\tilde{\Theta}}(\mathbf{s}_{t+1})] \leq \frac{B}{1-D} \sum_n \mathbb{E}[|P_n(s'|s, a) - \tilde{P}_n(s'|s, a)|_1] \leq \frac{BN}{1-D},$$

we have  $|X_t| \leq \frac{BN}{1-D}$ . Because  $\mathbb{E}[X_t | \mathbf{s}_1, \mathbf{a}_1, \dots, \mathbf{s}_t, \mathbf{a}_t] = 0$ ,  $X_t$  is a sequence of martingale difference due to the Bellman equation in (15). Applying Azuma-Hoeffding inequality yields,

$$\Pr\left(\sum_t X_t \geq \frac{BN}{1-D} \sqrt{T \log \frac{4SANT}{\eta}}\right) \leq \left(\frac{\eta}{4SANT}\right)^{\frac{1}{2}}.$$

Hence, conditioned on good event we have

$$\text{Reg}(\pi^*, T_2) \leq \mathcal{O}\left(\frac{BN}{1-D} \sqrt{T \log \frac{4SANT}{\eta}}\right).$$

□

### C.3 Total Regret

According to Lemma 5, Lemma 7 and Lemma 11, when  $J(T) = \sqrt{T}$ , the total regret is given by

$$\text{Reg}(\pi^*, T) = \text{Reg}(T_1) + \text{Reg}(\pi^*, T_2) = \mathcal{O}\left(\sqrt{T} \left(SAB + \frac{BN}{1-D} \sqrt{\log \frac{4SANT}{\eta}}\right)\right).$$

This completes the proof of Theorem 2.

## D Proof of Theorem 3

### D.1 Regret Decomposition

We begin by showing that the cumulative regret can be decomposed into the sum of regrets incurred during each episode. For simplicity, we denote  $c_n^k(s, a) := \sum_{h=1}^H \mathbb{1}(s_n^k(h) = s, a_n^k(h) = a)$  as the state-action counts for  $(s, a)$  in episode  $k$ . Then, we define the regret during episode  $k$  as follows,

$$\text{Reg}(\pi^{*,k}) := H\mu^{opt} - \sum_{(s,a)} \sum_n c_n^k(s, a) \bar{r}_n(s, a).$$

The relation between the total regret  $\text{Reg}(\{\pi^{*,k}, \forall k\}, T)$  and the episodic regrets  $\text{Reg}(\pi^{*,k})$  is as follows.

**Lemma 12.** *The regret of UC-R2MAB is upper-bounded by*

$$\text{Reg}(\{\pi^{*,k}, \forall k\}, T) \leq \sum_{k=1}^K \text{Reg}(\pi^{*,k}) + \sqrt{T \log \frac{4SANT}{\eta}},$$

with probability at least  $1 - (\frac{\eta}{4SANT})^{\frac{1}{2}}$ .

*Proof.* Let  $C_n^K(s, a)$  be the total number of visits to  $(s, a)$  until frame  $T$  under policy  $\{\pi^{*,k}, \forall k\}$ . Using Azuma-Hoeffding's inequality, we have

$$\mathbb{P}\left(R(\{\pi^{*,k}, \forall k\}, T) \leq \sum_n \sum_{(s,a)} C_n^K(s, a) \bar{r}_n(s, a) - \sqrt{4T \log \frac{4SANT}{\eta}}\right) \leq \left(\frac{\eta}{4SANT}\right)^{\frac{1}{2}}.$$

Therefore, we have

$$\begin{aligned} \text{Reg}(\{\pi^{*,k}, \forall k\}, T) &= T\mu^{opt} - R(\pi^*, T) \\ &\leq T\mu^{opt} - \sum_n \sum_{(s,a)} C_n^K(s, a) \bar{r}_n(s, a) + \sqrt{T \log \frac{4SANT}{\eta}} \\ &= \sum_{k=1}^K \text{Reg}(\pi^{*,k}) + \sqrt{T \log \frac{4SANT}{\eta}}. \end{aligned}$$

□

## D.2 Bounding the Episodic Regrets

We now bound the regrets  $\text{Reg}(\pi^{*,k})$ . Denote the true MDP as  $M := \{\mathcal{S}, \mathcal{A}, P_n, r_n, \forall n \in \mathcal{N}\}$ . Consider the confidence ball  $\mathcal{M}^k := \{M_n^k, \forall n\}$ . We further decompose the episodic regret into two parts, (i) the good event set  $\{M \in \mathcal{M}^k\}$ , and (ii) the failure event set  $\{M \notin \mathcal{M}^k\}$ . Thus,

$$\text{Reg}(\pi^{*,k}) = \text{Reg}(\pi^{*,k})\mathbb{E}[\mathbb{1}(M \in \mathcal{M}^k)] + \text{Reg}(\pi^{*,k})\mathbb{E}[\mathbb{1}(M \notin \mathcal{M}^k)].$$

Next we bound these two parts separately.

### D.2.1 Regret when confidence ball fails

The failure events occur when the true transition kernel and reward are outside the confidence balls, i.e.,

$$\begin{aligned}\mathcal{E}_p^k &:= \{\exists(s, a), n, |P_n(s'|s, a) - \hat{P}_n^k(s'|s, a)| > \delta_n^k(s, a)\}, \\ \mathcal{E}_r^k &:= \{\exists(s, a), n, |\bar{r}_n(s, a) - \hat{r}_n^k(s, a)| > \delta_n^k(s, a)\}.\end{aligned}$$

The cumulative probability that the failure events occur is bounded as follows.

**Lemma 13.** *We have*

$$\mathbb{P}(M \notin \mathcal{M}^k) \leq \frac{\eta}{(k-1)H},$$

$$\text{when } \delta_n^k(s, a) = \sqrt{\frac{1}{2C_n^{k-1}(s, a)} \log\left(\frac{4SAN(k-1)H}{\eta}\right)}.$$

*Proof.* By Chernoff-Hoeffding inequality [33], we have

$$\mathbb{P}(|P_n(s'|s, a) - \hat{P}_n^k(s'|s, a)| > \delta_n^k(s, a)) \leq \frac{\eta}{2SAN(k-1)H}.$$

Using union bound on all states, actions and users, we have

$$\begin{aligned}\mathbb{P}(M \notin \mathcal{M}^k) &\leq \sum_{n=1}^N \sum_{(s, a)} \mathbb{P}(|P_n(s'|s, a) - \hat{P}_n^k(s'|s, a)| > \delta_n(s, a)) \\ &\quad + \sum_{n=1}^N \sum_{(s, a)} \mathbb{P}(|\bar{r}_n(s, a) - \hat{r}_n^k(s, a)| > \delta_n(s, a)) \\ &\leq \frac{\eta}{(k-1)H}.\end{aligned}$$

□

Lemma 13 immediately yields a bound on the cumulative regret when the confidence balls fail.

**Lemma 14.** *By letting  $\eta \leq \frac{1}{2B}$ , We have*

$$\sum_{k=1}^K \text{Reg}(\pi^{*,k})\mathbb{E}[\mathbb{1}(M \notin \mathcal{M}^k)] \leq \frac{1}{2}\sqrt{T}.$$

*Proof.* By Lemma 13, we have

$$\begin{aligned}\sum_{k=1}^K \text{Reg}(\pi^{*,k})\mathbb{E}[\mathbb{1}(M \notin \mathcal{M}^k)] &\leq \sum_{k=1}^K \sum_n \sum_{(s, a)} c_n^k(s, a)\mathbb{E}[\mathbb{1}(M \notin \mathcal{M}^k)] \\ &\leq \sum_{k=1}^K HB\mathbb{E}[\mathbb{1}(M \notin \mathcal{M}^k)] \\ &\leq B \sum_{t=1}^T t\mathbb{E}[\mathbb{1}(M \notin \mathcal{M}^t)] \leq B\eta\sqrt{T} \leq \frac{1}{2}\sqrt{T},\end{aligned}$$

where  $\mathcal{M}^t$  is the plausible MDPs at time  $t$ , similar to the definition of  $\mathcal{M}^k$  for each  $k$ .

□

### D.2.2 Regret when true MDP is within the confidence balls

About the regret conditioned on good event, we have following lemma.

**Lemma 15.** *We have*

$$\text{Reg}(\pi^{*,k})\mathbb{E}[\mathbb{1}(M \in \mathcal{M}^k)] \leq \sum_{t=1}^H [P_{\tilde{\Theta}^k} F_{\tilde{\Theta}^k}](\mathbf{s}_t) - F_{\tilde{\Theta}^k}(\mathbf{s}_{t+1}).$$

*Proof.* This result follows directly from the definition of episodic regret in Lemma 9.  $\square$

**Lemma 16.** *Conditioned on the good event, we have the regret bounded as*

$$\sum_{k=1}^K \text{Reg}(\pi^{*,k})\mathbb{E}[\mathbb{1}(M \in \mathcal{M}^k)] \leq \frac{2\sqrt{2}B}{1-D} \sqrt{\log \frac{4SANT}{\eta}} \cdot \sqrt{NT}.$$

*Proof.* From Lemma 15, we can rewrite the summation over  $\text{Reg}(\pi^{*,k})$  as follows:

$$\begin{aligned} \sum_{k=1}^K \text{Reg}(\pi^{*,k})\mathbb{1}(M \in \mathcal{M}^k) &\leq \sum_{k=1}^K \sum_{h=1}^H [P_{\tilde{\Theta}^k} F_{\tilde{\Theta}^k}](\mathbf{s}_t) - F_{\tilde{\Theta}^k}(\mathbf{s}_{t+1}) \\ &\stackrel{(a)}{\leq} \sum_{k=1}^K \sum_{h=1}^H \left| [P_{\tilde{\Theta}^k} F_{\tilde{\Theta}^k}](\mathbf{s}_t) - F_{\tilde{\Theta}^k}(\mathbf{s}_{t+1}) \right| \\ &\stackrel{(b)}{\leq} \sum_{k=1}^K \sum_{h=1}^H \frac{1}{2} \text{span}(F_{\tilde{\Theta}^k}) \left\| P_{\tilde{\Theta}^k}(\cdot|\mathbf{s}_t, \mathbf{a}_t) - P_{\Theta^k}(\cdot|\mathbf{s}_t, \mathbf{a}_t) \right\|_1 \\ &\stackrel{(c)}{\leq} \frac{B}{1-D} \sum_{k=1}^K \sum_{h=1}^H \sum_{n=1}^N 2\delta_n^k(s, a) \\ &\leq \frac{2B}{1-D} \sum_{t=1}^T \sum_{n=1}^N \sqrt{\frac{1}{2C_n^t(s, a)} \log \frac{4SANT}{\eta}} \\ &\leq \frac{2B}{1-D} \sqrt{\log \frac{4SANT}{\eta}} \sum_{t=1}^T \sum_{n=1}^N \sum_{(s', a')} \mathbb{1}(s_n(t) = s', a') \sqrt{\frac{1}{2C_n^t(s', a')}} \\ &\leq \frac{2B}{1-D} \sqrt{\log \frac{4SANT}{\eta}} \sum_{n=1}^N \sum_{(s', a')} \sqrt{C_n^T(s', a')} \\ &\stackrel{(d)}{\leq} \frac{2\sqrt{2}B}{1-D} \sqrt{\log \frac{4SANT}{\eta}} \sum_{n=1}^N \sqrt{\sum_{(s', a')} C_n^T(s', a')} \\ &\stackrel{(e)}{\leq} \frac{2\sqrt{2}B}{1-D} \sqrt{\log \frac{4SANT}{\eta}} \cdot \sqrt{NT}, \end{aligned}$$

where (a) follows since  $\mathbb{E} \left[ \sum_{k=1}^K \sum_{h=1}^H [P_{\tilde{\Theta}^k} F_{\tilde{\Theta}^k}](\mathbf{s}_t) - F_{\tilde{\Theta}^k}(\mathbf{s}_{t+1}) \right] = 0$ , (b) follows standard linear algebra manipulation [2], (c) follows due to the good event occurs, (d) follows Cauchy-Schwartz inequality and (e) uses the fact that  $\sum_{n=1}^N \sum_{(s, a)} C_n^T(s, a) \leq NT$ .  $\square$

### D.3 Total Regret.

Combining the results in Lemma 12, Lemma 13, Lemma 14 and Lemma 16, we obtain the result in Theorem 3, i.e.,

$$\text{Reg}(\{\pi^{*,k}, \forall k\}, T) = \mathcal{O} \left( \sqrt{T} \left( \frac{1}{2} + \frac{2\sqrt{2}B\sqrt{N}}{1-D} \sqrt{\log \frac{4SANT}{\eta}} \right) \right).$$

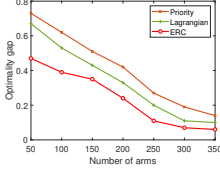

Figure 7: Optimality gap for 3 actions.

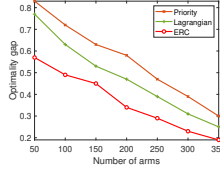

Figure 8: Optimality gap for 5 actions.

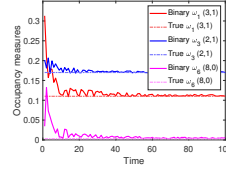

Figure 9: Global attractor with 2 actions.

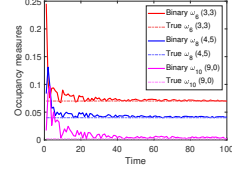

Figure 10: Global attractor with 5 actions.

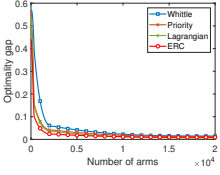

Figure 11: Optimality gap for 2 actions.

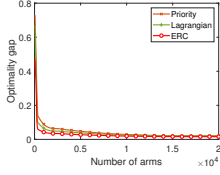

Figure 12: Optimality gap for 3 actions.

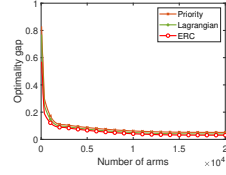

Figure 13: Optimality gap for 5 actions.

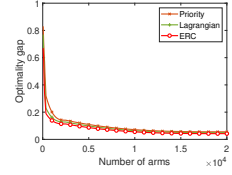

Figure 14: Optimality gap for 10 actions.

## E Additional Numerical Results

Complementary to the experimental results shown in Section 5, we present additional numerical results in this section.

**Optimality gap.** Besides the results for two actions and 10 actions, we now provide the optimality gap for 3 actions and 5 actions in Figures 7 and 8, respectively. Again, we observe that our proposed ERC index policy is asymptotically optimal and outperforms baselines in terms of the vanishing speed of optimality gap.

**Global attractor.** As indicated in Remark 2 in the main paper, the asymptotic optimality of our proposed ERC index policy is under the definition of global attractor as in state of the arts [63, 31, 61, 72, 24]. In Figure 9, we consider the case that there are two actions for each arm, and randomly pick three state-action pairs (3, 1), (2, 1), (8, 0) for illustration. As we can see that the occupancy measure of arm 1 for state-action pair (3, 1) indeed converges. Similarly for arm 3 with state-action pair (2, 1) and arm 6 with state-action pair (8, 0). Similar observations can be made for other number of actions, e.g., 5 actions in Figure 10. Therefore, the convergence indeed occurs for our ERC index policy  $\pi^*$  and hence we verify the global attractor condition.

**The number of arms.** We consider the same setting as in Section 5.1 in the main paper, and investigate the impact of the number of arms. The optimality gap comparison with 2, 3, 5, and 10 actions are presented in Figures 11-14. Again, we observe that all policies are asymptotically optimal. Though the optimality is established in the asymptotic regime (i.e., a large number of arms), we observe that the optimality gap of each policies quickly decreases and gets close to zero.

**Regret.** We consider the same setting as in Section 5 in the main paper. Figures 15 and 16 present the accumulated regrets when there are 3 and 5 actions, respectively, supplementary to the results for 2 and 10 actions in the main paper. Again, we observe that UC-R2MAB achieves the lowest accumulative regret. Furthermore, when  $T$  is large, our “offline” GM-R2MAB outperforms the “online” MAIQL.

In addition, as mentioned in Section 5.1, there are several learning based solutions that are designed for the conventional restless bandits with binary actions. We categorize them by “offline” or “online” solutions. First, Restless-UCB [62] is an “offline” learning solution, and hence we compare it with our GM-R2MAB. As shown in Figure 17, our GM-R2MAB outperforms Restless-UCB. One reason is that GM-R2MAB leverages our proposed provably optimal ERC index policy in the exploitation phase. Second, there is a set of “online” learning algorithms for restless bandits, in particular, learning the celebrated Whittle index policy, e.g., Fu [25], AB [8], WIQL [15], NeurWin [50] and a Thompson sampling policy (which we denote as TS2) [2]. For Fu, AB and WIQL, we consider that the discount factor is  $\alpha = 0.99$ , learning rates are initialized to  $\gamma(0) = 0.01$  and  $\eta(0) = 0.01$ , and are decayed by half every 1,000 time steps. The exploration and exploitation parameter is set as  $\epsilon = 0.05$ . Finally, NeurWin is a neural network based approach. We adopt the same setting as in [50]. Specifically, the neural network is fully connected and consists of 1 input layer, 1 output layer and two hidden

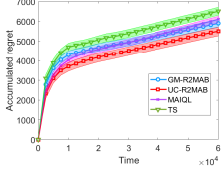

Figure 15: Regret for 3 actions.

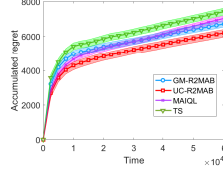

Figure 16: Regret for 5 actions.

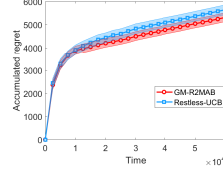

Figure 17: GM-R2MAB vs. Restless-UCB

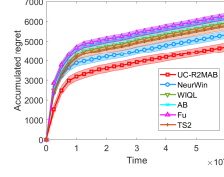

Figure 18: UC-R2MAB vs. Whittle policies

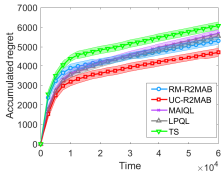

Figure 19: Regret for 2 actions with 200 arms.

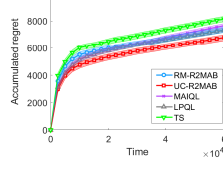

Figure 20: Regret for 10 actions with 200 arms.

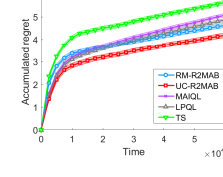

Figure 21: Regret for 2 actions with 2,000 arms.

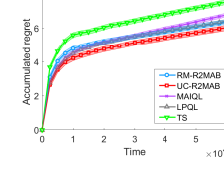

Figure 22: Regret for 10 actions with 2,000 arms.

layers. In the two hidden layer, there are 16 and 32 neurons. The output layer has one neuron and input layer has 11 neurons. ReLU activation function is used for the two hidden layers. The initial learning rate is set to  $L = 0.001$ , with the Adam optimizer employed for the gradient ascent step. The discount factor is  $\beta = 0.99$  with an episode horizon of 100 timesteps. Each mini-batch consists of five episodes. From Figure 18, we again observe that our “online” UC-R2MAB outperforms these baselines. More importantly, our UC-R2MAB is designed for restless bandits with multiple actions, as motivated by many practical applications, while these baselines are only for binary-action settings since they focus on learning the Whittle index policy.

In addition, we consider 2 and 10 actions, with 200 and 2,000 arms. The corresponding accumulated regrets are shown in Figures 19-22. We also compare our algorithms with a state-of-the-art method named LPQL [39]. Again, we observe that UC-R2MAB achieves the lowest accumulative regret. We also compare the average running time of these algorithms. For two-action (10-action) setting with a total of 200 arms, the average running time of GM-R2MAB, UC-R2MAB, MAIQL, LPQL, and TS is 86s (144s), 308s (607s), 348s (702s), 314s (623s) and 359s (681s), respectively. Similarly, when the total number of arms is 1,000, the average running time with two-action (10-action) of GM-R2MAB, UC-R2MAB, MAIQL, LPQL, and TS is 114s (188s), 443s (813s), 512s (912s), 470s (947s) and 560s (901s), respectively. Finally, when the total number of arms is 2,000, the average running time with two-action (10-action) of GM-R2MAB, UC-R2MAB, MAIQL, LPQL, and TS is 179s (261s), 703s (1187s), 810s (1354s), 724s (1247s) and 823s (1340s), respectively. It is clear that our GM-R2MAB and UC-R2MAB are more efficient in running time.

**Additional algorithm settings.** In the main paper, we compare with a Thompson sampling policy (TS) [38]. In this policy, we set the prior distribution to be uniform over a finite support  $\{0, 0.1, 0.2, \dots, 0.9, 1.0\}$ .

**Wireless scheduling over fading channels** [1]. The problem of wireless scheduling over fading channels were studied in a recent paper [1]. In this problem, a wireless client is modeled as an arm, which has some data to transmit. Each arm suffers from 1 unit holding cost in each time slot until the data is transmitted. The quality of wireless channel, either good or bad, via which data is transmitted determines the amount of transmitted data and varies over time. The goal is to maximize the negative of total holding cost. Finding the Whittle index through theoretical analysis is difficult, even for the simplified cases when the channel quality is i.i.d.. We adopt the settings in [1], where 1 out of 10 arms is activated at any moment in time.

**Tuberculosis care in India** [40]. In this problem, a single community health worker can manage up to 200 patients throughout the course of 6-month antibiotic regimen, monitoring and encouraging patients to take their daily medication. A health worker takes three actions to improve their adherence over a course of 6 months. Each action has varying cost and effective: cheap (call the patient), semi-expensive (visit the patient) and very expensive (escalate the patient). The goal is to maximize

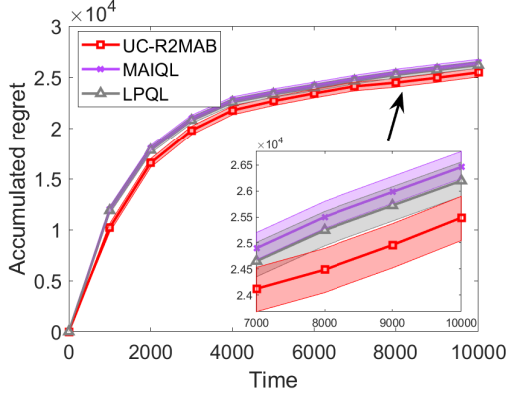

Figure 23: Wireless scheduling.

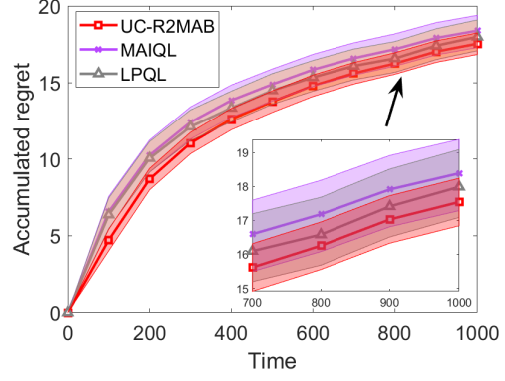

Figure 24: Tuberculosis care in India.

patients' adherence subject to a daily time budget due to the limited worker time and resources. We adopt the settings in [40] with the budget being 20 and the reward defined as adherence level/3. More details can be found in [40].

In addition, the accumulated regret comparisons using real-world datasets between UC-R2MAB, MAIQL and LPQL are presented in Figures 23 and 24, respectively. We again observe that UC-R2MAB achieves a sub-linear regret and outperforms all baselines.
